1  
2  
3  
4  
5  
6  
7  
8  
9  
10  
11  
12  
13  
14  
15  
16  
17  
18  
19  
20  
21  
22  
23  
24  
25  
26  
27  
28  
29  
30  
31  
32  
33  
34  
35  
36  
37  
38  
39  
40  
41  
42

**Title**

**Using oxygen and hydrogen stable isotopes to track the migratory movement of Sharp-shinned Hawks (*Accipiter striatus*) along Western Flyways of North America**

**Short title**

**Isotopes track migrating Sharp-shinned Hawks (*Accipiter striatus*) in Western North America**

Elizabeth A. Wommack<sup>1,2,3¶\*</sup>, Lisa C. Marrack<sup>4¶#a</sup>, Stefania Mambelli<sup>3¶</sup>, Joshua M. Hull<sup>2,5</sup>, Todd E. Dawson<sup>3,4</sup>

<sup>1</sup>University of Wyoming Museum of Vertebrates, Department of Zoology & Physiology, University of Wyoming, Laramie, Wyoming, United States of America

<sup>2</sup>Golden Gate Raptor Observatory, Sausalito, California, United States of America

<sup>3</sup>Department of Integrative Biology, University of California, Berkeley, California, United States of America

<sup>4</sup>Department of Environmental Science, Policy & Management, University of California, Berkeley, California, United States of America

<sup>5</sup>Department of Animal Science, University of California, Davis, California, United States of America

<sup>#a</sup>Current Address: Tropical Conservation Biology and Environmental Science (TCBES) Graduate Program, University of Hawaii, Hilo, Hawaii, United States of America

\*Corresponding author  
E-mail: ewommack@uwyo.edu (EAW)

¶These authors contributed equally to this work.

## 43 **Abstract**

44

45 The large-scale patterns of movement for the Sharp-shinned Hawk (*Accipiter striatus*), a small  
46 forest hawk found throughout western North America, are largely unknown. However, based on  
47 field observations we set out to test the hypothesis that juvenile migratory *A. striatus* caught  
48 along two distinct migration routes on opposite sides of the Sierra Nevada Mountains of North  
49 America (Pacific Coast and Intermountain Migratory Flyways) come from geographically  
50 different natal populations. We applied stable isotope analysis of hydrogen (H) and oxygen (O)  
51 of feathers, and large scale models of spatial isotopic variation (isoscapes) to formulate spatially  
52 explicit predictions of the origin of the migrant birds. Novel relationships were assessed between  
53 the measured hydrogen and oxygen isotope values of feathers from *A. striatus* museum  
54 specimens of known origin and the isoscape modeled hydrogen and oxygen isotope values of  
55 precipitation at those known locations. We used these relationships to predict the origin regions  
56 for birds migrating along the two flyways from the measured isotope values of migrant's feathers  
57 and the associated hydrogen and oxygen isotopic composition of precipitation where these  
58 feathers were formed. The birds from the two migration routes had overlap in their  
59 natal/breeding origins and did not differentiate into fully separate migratory populations, with  
60 birds from the Pacific Coast Migratory Flyway showing broader natal geographic origins than  
61 those from the Intermountain Flyway. The methodology based on oxygen isotopes had, in  
62 general, less predictive power than the one based on hydrogen. There was broad agreement  
63 between the two isotope approaches in the geographic assignment of the origins of birds  
64 migrating along the Pacific Coast Flyway, but not for those migrating along the Intermountain  
65 Migratory Flyway. These results are discussed in terms of their implications for conservation

66 efforts of *A. striatus* in western North America, and the use of combined hydrogen and oxygen  
67 stable isotope analysis to track the movement of birds of prey on continental scales.

68

## 69 **Introduction**

70 Thousands of bird species migrate, traveling from breeding territories to wintering grounds and  
71 back annually, sometimes over vast distances and geographical features [1]. Such seasonal  
72 movements make the factors that stress populations of migratory birds difficult to track, as  
73 individuals may be affected by changes at any point along their migratory route [2–4]. As a  
74 result, understanding the migratory paths and connections between breeding and wintering sites  
75 is critical for strategizing conservation and preservation actions for particular bird species, such  
76 as raptors which are often secretive and breed over a wide area [5].

77         Migratory routes taken by different birds that follow similar pathways across continents  
78 are identified as migratory “flyways”, which are hypothesized to represent the shortest and least  
79 costly course over wide geographic distances [6]. Differences in the choice of migratory flyway  
80 between and within species may represent evolutionary divergences related to specific  
81 adaptations [7–9]. For some species, individuals that stray from or cross between flyways  
82 experience higher costs to migration, therefore evolutionary associations are likely to exist  
83 between populations of birds and specific migratory flyways [10–12]. One common way to  
84 monitor populations of birds of prey is by tracking migratory movement at watch sites and  
85 banding stations along migratory flyways [5, 13, 14]. Long-term data sets from raptor migration  
86 watch-sites can indicate population dynamics for specific species and populations, which can  
87 provide indications of changes in population size [15–19]. However, it can be difficult to connect  
88 migrating birds to other geographic stages in their life cycle (breeding and wintering) through

89 these data, and without these connections it may be problematic to understand what factors  
90 underlie population size changes [20].

91         The Sharp-shinned Hawk (*Accipiter striatus*) is a small, forest hawk found throughout  
92 North America [21]. During breeding, *A. striatus* prefers dense coniferous and deciduous forests,  
93 making nesting sites difficult to identify and survey, and breeding birds problematic to monitor  
94 [21–23]. Heavy persecution resulting from the shooting of thousands along migration routes each  
95 year in the late 19<sup>th</sup> and early 20<sup>th</sup> centuries [22, 24], combined with the effects of  
96 dichlorodiphenyltrichloroethane (DDT) used as a pesticide in the early 20<sup>th</sup> century, resulted in  
97 *A. striatus* numbers decreasing steadily across the species' range [25]. However, over the past  
98 several decades, data from population and migratory monitoring of the species have shown  
99 inconsistent and contrary trends of both significant increases and decreases [26, 13]. Since North  
100 America's smallest hawk is difficult to track on its breeding grounds, most population  
101 monitoring occurs at watch and banding sites along migratory flyways. Connecting migratory  
102 flyways and watch sites with specific breeding ranges will allow for a greater understanding of  
103 wider populations trends for this secretive bird of prey.

104         Raptors in the western side of the North American continent are believed to travel along  
105 three migratory flyways: the Pacific Coast, the Intermountain, and the Rocky Mountain Flyways  
106 [12]. Band recovery data of *A. striatus* trapped at migration sites along each of the flyways have  
107 shown demographic population differentiation along each route [12, 15, 27]. However, sample  
108 sizes for band returns are often small and may therefore represent biased information [28].  
109 Endogenous markers, such as genetic analysis and stable isotope analysis (SIA), are not able to  
110 provide the same level of precision on locality as extrinsic markers (i.e. bands, satellite  
111 telemetry), but are easier and less expensive to use with large sample sizes, and can provide a

112 larger return in data for wide geographic areas [29–35]. Integrating information from both levels  
113 of analysis can provide the best account of current population trends, and allow researchers to  
114 connect migratory flyway monitoring data with information on geographical breeding areas.

115 Over the past few decades, a number of studies have used SIA of naturally occurring  
116 hydrogen (H) of feathers in order to estimate migratory patterns and ecological connectivity  
117 among habitats for a broad range of species of birds [36]. In comparison, only recently with  
118 advances in continuous flow pyrolysis techniques have reliable SIA of oxygen (O) of organic  
119 materials been possible. Therefore, much less data exist on the additional information that can be  
120 obtained by measuring both elements to trace animal movements from different tissue types,  
121 such as feathers and hair [37–40].

122 Keratin, the main constituent of feathers, remains chemically inert following its synthesis,  
123 and it incorporates hydrogen and oxygen from consumed water and dietary sources. The stable  
124 hydrogen and oxygen isotopic compositions in the keratin of a feather ( $\delta^2\text{H}_F$  and  $\delta^{18}\text{O}_F$  values)  
125 therefore become markers of the environmental conditions and will vary geographically due to  
126 the spatial variation in the stable hydrogen and oxygen isotopic composition of meteoric  
127 precipitation ( $\delta^2\text{H}_P$  and  $\delta^{18}\text{O}_P$  values) [41]. This variation is caused primarily by isotope effects  
128 associated with evaporation and condensation processes [42–44] and correlates inversely with  
129 latitude and elevation across the continents [45]. Additionally, because hydrogen and oxygen are  
130 incorporated or “routed” into organic compounds like keratin along different metabolic  
131 pathways, the  $\delta^2\text{H}$  and  $\delta^{18}\text{O}$  of feather keratin may not provide the same information even if  
132 these elements had their origin from the same water source.

133 Linking the isotopic composition of animal tissue to geographic locations of origin is  
134 based on important assumptions, such as the presence of known and constant isotope effects

135 associated with tissue synthesis, and an understanding of the relationship between the isotopic  
136 compositions of the tissue and that of the environmental food web and water source signals [46,  
137 39, 74]. However, work on some species of birds suggests a decoupling between hydrogen and  
138 oxygen isotope compositions in food webs that might affect the usefulness of  $\delta^{18}\text{O}_F$   
139 measurements for assignment of bird origin [48, 49, 39].

140 Previous SIA studies have used  $\delta^2\text{H}_F$  values to estimate the timing and pattern of  
141 migration for *A. striatus* from western North America [50, 51]. Birds migrating along the  
142 Intermountain Flyway were found to originate from the Northern Rocky Mountain Range (Idaho  
143 (ID) and Montana (MT)) in the United States of America (USA) north through British Columbia  
144 (BC, Canada) [51]. Specific origins were not determined for birds caught along the Rocky  
145 Mountain Flyway, but it has been shown that *A. striatus* followed a chain migration pattern  
146 where individuals from lower latitudes migrated earlier than those from higher latitudes [50].  
147 However, no work has been done to look at the origins of *A. striatus* from the Pacific Coast  
148 Flyway or has incorporated two isotopes to trace the origin of birds from neighboring flyways.

149 Migration can be a difficult and dangerous behavior for birds, and specific adaptations for  
150 breeding populations that use different flyways would be anticipated to lead to population  
151 differentiation [52]. If flyways represent unique migratory paths for different populations, then it  
152 can be predicted that *A. striatus* migrating along neighboring flyways should originate from  
153 separate breeding origins, as hinted at by their band results [12, 15]. However, no genetic  
154 difference in mitochondrial control region sequences has been found between *A. striatus* caught  
155 on migration along either flyway [53], suggesting that either birds that utilize the different routes  
156 overlap and intermix in their breeding populations or that mitochondrial markers lack the  
157 variability to resolve population genetic differentiation among flyways. Use of nuclear

158 microsatellite loci has demonstrated differentiation between the intermountain and Pacific  
159 flyways in another wide-ranging raptor, the Red-tailed Hawk (*Buteo jamaicensis*) [54],  
160 suggesting that similar differences among flyways may exist in *A. striatus*.

161 In this study, we used the variation in  $\delta^2\text{H}_F$  and  $\delta^{18}\text{O}_F$  values of *A. striatus* and large scale  
162 models of spatial isotopic variation (isoscapes) for hydrogen and oxygen to: a) examine the origin  
163 of *A. striatus* caught along the Pacific Coast Flyway in comparison to birds caught along the  
164 Intermountain Flyway, and b) investigate the usefulness of oxygen isotopes to determine the  
165 origin of raptorial birds of prey. First, we established relationships, separately for hydrogen and  
166 oxygen, between  $\delta^2\text{H}_F$  and  $\delta^{18}\text{O}_F$  values of *A. striatus* museum specimens from known natal  
167 locations, to predict the isotope values of precipitation at the origin regions of birds migrating  
168 along the Pacific Coast and Intermountain Flyways from the measured isotope values of  
169 migrant's feathers. Prediction of precipitation hydrogen and oxygen isotope composition and  
170 assignment of migrating bird origin locations were accomplished using an internet-based  
171 environmental water isoscape of Western North America (<http://isomap.org>) [55]. Finally,  
172 predictions of sites of origin based on  $\delta^2\text{H}_P$  and  $\delta^{18}\text{O}_P$  values were also compared.

173 Assuming that the choice of migratory flyway is driven by evolutionary processes [11],  
174 and that it would be costly for individuals to jump between migratory routes, we predicted that *A.*  
175 *striatus* caught along the Pacific Coast Flyway would originate from further west than those  
176 caught along the Intermountain Flyway, and show little overlap in their determined natal origins.  
177 However, instead the SIA revealed that birds from the Pacific Coast Flyway origins extended  
178 further east than expected, including into the Rocky Mountain Range and the western interior of  
179 North America. We report that both hydrogen and oxygen isotopic analysis with feathers can be

180 used to determine the origin of migratory birds of prey, but that caution must be taken when  
181 interpreting the outcome.

182

## 183 **Materials and methods**

### 184 **Sample collection**

185 Contour feathers of *A. striatus* from the ventral sternal feather track ( $n = 23$  juveniles (Table 1,  
186 Fig 1) and  $n = 25$  adults (Table S1, S1 Fig) were sampled from museum specimens of known  
187 collection locality. *A. striatus* follow a complex basic strategy of molt, and have a limited to  
188 absent preformative molt which occurs for hatch-year and second-year birds between December  
189 and April of their first year. Adult molt (the definitive prebasic molt) occurs primarily on  
190 breeding grounds, starting during egg laying and incubation [21, 56]. As a result of this molt  
191 strategy both juvenile and adult *A. striatus* contour feathers have a high probability of being  
192 grown either in the location where they were hatched or where they were breeding. Contour  
193 feathers in ventral sternal feather track were selected for the small size of the feather, the ease of  
194 repeatability of selection of feathers from the same track for collection from individual birds, and  
195 as contour feathers have been used successfully to track movement of *A. striatus* in previous  
196 work [51]. Feather samples of *A. striatus* were obtained from the following museums in the  
197 USA: California Academy of Sciences (CAS), San Francisco, CA; Charles R. Conner Museum,  
198 Pullman (CRCM), WA; Museum of Vertebrate Zoology (MVZ), University of California,  
199 Berkeley, CA; San Diego Natural History Museum (SDNHM), San Diego, CA; University of  
200 Wyoming Museum of Vertebrates (UWYMV), Laramie, WY. In order to acquire samples that  
201 were representative of feathers grown on breeding and natal geographic regions of interest,  
202 specimens were constrained by date of collection (15<sup>th</sup> March – 30<sup>th</sup> August), and feather wear



203 [56, 21, 57]. Only feathers with little or no wear were from museum specimens were selected to  
204 guarantee that they were grown in the present year and at the location of collection. Feathers  
205 were also sampled from migrating juvenile *A. striatus* banded at the Marin Headlands, Marin  
206 County, CA (Golden Gate Raptor Observatory (GGRO), Pacific Coast Flyway,  $n = 20$ ), and the  
207 Goshutes Mountains, Elko County, NV (HawkWatch International (Goshutes), Intermountain  
208 Flyway,  $n = 10$ ) between August and October 1999 (see [53] for sampling protocol). The  
209 migratory birds used in this study were collected with samples previously used to analyze the  
210 genetic population structure of *A. striatus*, and so are known to be from the western genetic  
211 population [53]. However, the specific origin of migrating individuals was unknown. No live  
212 birds were handled for the described study. Sampling of birds at banding stations was performed  
213 in 1999, and feathers used in this study were from archived collections.

214 **Fig 1. Map of sample locations for museum specimens of juvenile Sharp-shinned Hawk**  
215 **(*Accipiter striatus*) feathers.**

216 Museum specimens ( $n = 23$ ) mapped in reference to the species known range in Western North  
217 America (light gray), and suitable forest habitat (dark gray). Juvenile samples ( $n = 23$ ) are shown  
218 as triangles. Collection sites of migratory bird samples are indicated as GGRO (Golden Gate  
219 Raptor Observatory) and GOSH (Goshutes Mountains). The dominant migratory flyways of  
220 western North America are indicated by dashed lines and modified from Hoffman et al. (2002)  
221 for illustrative purposes. State and country boundaries are modified from public domain GIS  
222 files, US Census Bureau (2016) and Natural Earth (2020). Species range acquired with  
223 permission from BirdLife International and NatureServe (2015), and data to create the GIS  
224 biome layer acquired from Brown, Bennan, and Unmack (2007).

225

226 **Table 1. Hydrogen and oxygen stable isotope composition of feathers of museum juvenile**  
227 **Sharp-shinned Hawk (*Accipiter striatus*) specimens ( $\delta^2\text{H}_f$  and  $\delta^{18}\text{O}_f$  values (‰)), and**  
228 **IsoMAP isoscape modeled stable hydrogen and oxygen isotope composition of precipitation**  
229 **( $\delta^2\text{H}_p$  and  $\delta^{18}\text{O}_p$  values (‰)) of known natal origin.**

230

231

232

233

234

235

236

237

| <sup>a</sup> Museum | <sup>b</sup> Specimen no. | Life stage | <sup>c</sup> State | Latitude   | Longitude  | $\delta^2\text{H}_f$ (‰) | $\delta^{18}\text{O}_f$ (‰) | $\delta^2\text{H}_p$ (‰) | $\delta^{18}\text{O}_p$ (‰) |
|---------------------|---------------------------|------------|--------------------|------------|------------|--------------------------|-----------------------------|--------------------------|-----------------------------|
| MVZ                 | 169006                    | Juvenile   | AK                 | 61.0561111 | -149.79722 | -80.3                    | 12.88                       | -124.9                   | -13.23                      |
| MVZ                 | 99707                     | Juvenile   | BC                 | 54.0167    | -132.15    | -39.3                    | 12.09                       | -95.5                    | -12.07                      |
| MVZ                 | 32217                     | Juvenile   | CA                 | 36.537017  | -121.9262  | -18.7                    | 16.23                       | -36.9                    | -4.36                       |
| MVZ                 | 144621                    | Juvenile   | ID                 | 48.4797    | -116.8483  | -46.7                    | 16.99                       | -102.8                   | -12.79                      |
| MVZ                 | 15622                     | Juvenile   | BC                 | 48.9895    | -124.8     | -70.5                    | 8.76                        | -72.0                    | -8.95                       |
| MVZ                 | 81827                     | Juvenile   | BC                 | 49.6833    | -124.9333  | -44.0                    | 13.03                       | -71.9                    | -10.02                      |
| MVZ                 | 99705                     | Juvenile   | BC                 | 54.0167    | -132.15    | -44.9                    | 12.69                       | -95.5                    | -12.07                      |
| MVZ                 | 99706                     | Juvenile   | BC                 | 54.0167    | -132.15    | -58.3                    | 13.07                       | -95.5                    | -12.07                      |
| MVZ                 | 30835                     | Juvenile   | CA                 | 39.6863371 | -123.48519 | -12.1                    | 22.22                       | -51.2                    | -5.65                       |
| MVZ                 | 9775                      | Juvenile   | AK                 | 57.03139   | -132.8536  | -65.1                    | 11.60                       | -122.4                   | -14.60                      |
| CAS                 | 58055                     | Juvenile   | CA                 | 39.14057   | -120.2011  | -60.5                    | 15.76                       | -83.0                    | -5.98                       |
| CAS                 | 87247                     | Juvenile   | CA                 | 41.78846   | -124.1668  | -34.9                    | 13.12                       | -49.2                    | -5.55                       |
| CAS                 | 98830                     | Juvenile   | CA                 | 38.49657   | -122.9394  | -26.0                    | 16.72                       | -42.4                    | -4.76                       |
| CRCM                | 57-367                    | Juvenile   | WA                 | 48.66223   | -117.9829  | -75.4                    | 13.04                       | -97.6                    | -12.18                      |
| CRCM                | 57-368                    | Juvenile   | WA                 | 48.66223   | -117.9829  | -81.1                    | 13.26                       | -97.6                    | -12.18                      |
| CRCM                | 89-229                    | Juvenile   | WA                 | 46.79025   | -117.2521  | -87.0                    | 10.05                       | -94.2                    | -9.72                       |
| CRCM                | 89-223                    | Juvenile   | WA                 | 46.73064   | -117.1625  | -67.4                    | 11.41                       | -94.2                    | -10.01                      |
| UWYMV               | 1352                      | Juvenile   | WY                 | 44.27615   | -110.4736  | -103.7                   | 8.62                        | -102.5                   | -11.99                      |
| UWYMV               | 2521                      | Juvenile   | WY                 | 43.83333   | -110.7     | -75.1                    | 13.41                       | -100.0                   | -11.47                      |
| UWYMV               | 2547                      | Juvenile   | CO                 | 40.39162   | -106.9051  | -62.2                    | 15.97                       | -82.7                    | -9.67                       |
| SDNHM               | 52830                     | Juvenile   | WA                 | 47.8674    | -122.516   | -35.6                    | 10.90                       | -69.0                    | -8.40                       |
| SDNHM               | 54234                     | Juvenile   | AZ                 | 35.1957    | -111.6326  | -26.0                    | 17.19                       | -52.0                    | -5.78                       |
| SDNHM               | 18938                     | Juvenile   | CA                 | 35.50708   | -118.3434  | -85.3                    | 10.08                       | -64.8                    | -4.72                       |

239 <sup>a</sup>Museums: CAS = California Academy of Sciences, San Francisco, CA, USA; CRCM = Charles R. Conner  
 240 Museum, Pullman, WA, USA; MVZ = Museum of Vertebrate Zoology, University of California, Berkeley, CA,  
 241 USA; SDNHM = San Diego Natural History Museum, San Diego, CA, USA; and UWYMV = University of  
 242 Wyoming Museum of Vertebrates: Laramie, WY, USA.

243 <sup>b</sup>Specimens: Full information on each specimen can be obtained by taking the specimen number and searching for it  
 244 in the online databases in <http://vertnet.org/index.html> and <https://arctosdb.org/>

245 °State or Provinces: AK = Alaska, USA; AZ = Arizona, USA; BC = British Colombia, Canada; CA = California,  
246 USA; CO = Colorado, USA; ID = Idaho, USA; NM = New Mexico, USA; NV = Nevada, USA; OR = Oregon,  
247 USA; UT = Utah, USA; WA = Washington, USA; WY = Wyoming, USA.  
248  
249

## 250 **Sample preparation and SIA**

251 Feathers were cleaned by immersion in a chloroform:methanol 2:1 (v/v) solution for 24 hours,  
252 and then again for 1 hour, to remove lipids and mites. After each wash the feathers were air dried  
253 for 24 hours [58–59]. The barbs were removed from the rachis, minced, and 1.5-2.0 mg of  
254 feather material was packed into 3.5 x 5 mm silver capsules. To avoid the possibility of  
255 intrafeather variation found in distal versus proximal samples for some raptor feathers, barbs for  
256 oxygen and hydrogen samples were removed from corresponding sides of each contour feather  
257 [57]. Previous work on other species of raptors has found that breeding condition and age may  
258 affect  $\delta^2\text{H}_\text{F}$  values differently in juvenile versus adults [60–62]. Therefore, adult samples were  
259 removed from analysis reflecting these concerns. Only samples from juvenile individuals were  
260 analyzed for both  $\delta^{18}\text{O}_\text{F}$  and  $\delta^2\text{H}_\text{F}$  values (museum:  $n = 23$ , migratory:  $n = 21$ ). However, as there  
261 are no published results of the differences for stable oxygen isotope measurements between adult  
262 and juvenile birds of prey, we present the  $\delta^{18}\text{O}$  values for adult *A. striatus* samples of known  
263 origin ( $n = 25$ ) as Supporting Information in this paper (S1 Table, S1 Fig).

264 The stable isotope abundances are presented in  $\delta$  notation as deviations from the  
265 standard reference (V-SMOW) in parts per mil (‰) according to the following equation:  $\delta X =$   
266  $(R_{\text{sample}}/R_{\text{standard}}) - 1$  where X represents  $^2\text{H}$  or  $^{18}\text{O}$ , and R the ratio of the heavy and light isotope  
267 (e.g.,  $^{18}\text{O}/^{16}\text{O}$ ) in the sample and in the standard, respectively.

268 The  $\delta^{18}\text{O}$  measurements were performed at the Center for Stable Isotope  
269 Biogeochemistry (University of California, Berkeley, CA, USA) using a PYRO Cube

270 (Elementar, Hanau, Germany) interfaced to a Thermo Delta V mass spectrometer (Thermo  
271 Fisher Scientific Inc., Waltham, Massachusetts, USA). The  $\delta^2\text{H}$  measurements were carried out  
272 at the Cornell Isotope Laboratory (Cornell University, Ithaca, NY, USA) using a Temperature  
273 Conversion Elemental Analyzer (TC/EA) interfaced to a Thermo Delta V mass spectrometer  
274 (both from Thermo Fisher Scientific Inc., Waltham, Massachusetts, USA). Both measurements  
275 were based on pyrolysis of the sample carried out in reactors kept at 1350 °C, with GC  
276 temperature kept at 90°C for hydrogen analysis, and CO trap temperature kept at 40 °C and then  
277 increased to 130 °C for release of CO for oxygen analysis.

278 Reference materials of kudu horn and caribou hoof keratins (KHS and CBS) were used  
279 for normalization ( $\delta^{18}\text{O}$  value = +20.3 ‰ and +3.8‰, respectively [63];  $\delta^2\text{H}$  value = -35.3 ‰  
280 and -157.0 ‰, respectively [64]), and an in-house keratin material was used as quality control  
281 material for both hydrogen and oxygen stable isotope measurements. The precision of the  
282 analysis was  $\pm 2.8\text{‰}$  and  $0.30\text{‰}$  for hydrogen and oxygen, respectively. To correct the measured  
283 hydrogen isotope ratios for the contribution of exchangeable hydrogen atoms to the total number  
284 of hydrogen atoms in feathers (~15%) [47, 63, 65], samples were allowed to equilibrate with the  
285 laboratory ambient atmosphere along with KHS and CBS standards for a minimum of 72 hours  
286 before isotopic analysis [65].

287 A linear regression approach was used to examine the relationship between measured  
288  $\delta^2\text{H}_\text{F}$  and  $\delta^{18}\text{O}_\text{F}$  values from *A. striatus* feathers for museum samples of known natal/breeding  
289 origin as well as in birds sampled at the two migratory banding sites.

290

291 **H and O precipitation Isoscapes for *Accipiter striatus* museum**  
292 **samples of known natal/breeding origin**

293 IsoMAP, a web resource for isoscapes modeling, (<http://www.waterisotopes.org>)[66], was used  
294 to predict the hydrogen and oxygen isotopic compositions of precipitation ( $\delta^2\text{H}_\text{P}$  and  $\delta^{18}\text{O}_\text{P}$   
295 values) at the locations where museum specimens were collected. Isoscapes are gridded surfaces  
296 representing spatially explicit isotope distributions across a landscape [46, 67]. IsoMAP software  
297 creates water isoscapes by using precipitation isotope data from the Global Network for Isotopes  
298 in Precipitation (GNIP) database administered by the International Atomic Energy Association  
299 and World Meteorological Organization [68]. Within IsoMAP, numerous parameters can be  
300 selected to create an isoscape model that is the best fit for a specific study area and time period  
301 since the geographical variation of  $\delta^2\text{H}_\text{P}$  and  $\delta^{18}\text{O}_\text{P}$  values depend on a range of geographic and  
302 meteorological effects including latitude, season, elevation, and regional air mass circulation.  
303 Independently for each isotope, we modeled the geographic distribution of  $\delta^2\text{H}_\text{P}$  and  $\delta^{18}\text{O}_\text{P}$  values  
304 across North America using precipitation data collected from 1960–1999 during the months from  
305 March to September to represent the plant growing season [68, 69]. Comparisons of different  
306 precipitation isotope models available in IsoMAP revealed that the most robust isoscapes that  
307 represented  $\delta^2\text{H}_\text{P}$  and  $\delta^{18}\text{O}_\text{P}$  values across North America were kriging interpolation models. The  
308  $\delta^2\text{H}_\text{P}$  isoscape produced was based on 117 stations, had resolution of 9x9 km, a correlation  
309 parameter of 0.93, and included the variables elevation (ETOPO,  $P < 0.001$ ), latitude ( $P < 0.001$ )  
310 and longitude ( $P = 0.06$ ) (available as IsoMAP job key 50333, S2 Fig [70]). The most robust  
311  $\delta^{18}\text{O}_\text{P}$  isoscape was based on 120 stations, had resolution of 9x9 km, a correlation parameter of  
312 0.92, and included the variables elevation (ETOPO,  $P < 0.001$ ), latitude ( $P < 0.001$ ) and  
313 longitude ( $P = 0.05$ ) (available as IsoMAP job key 63026, S2 Fig [71]).

314 The hydrogen and oxygen isoscape precipitation models were further modified using the  
315 spatial software ArcGIS (ESRI 2010). In particular, we limited the spatial isotopic predictions to

316 the known habitat range of *A. striatus* using a geographic information system (GIS) layer of  
317 range delineation provided by BirdLife International and NatureServe [72]. In addition, because  
318 this species is found to nest specifically in forests [21], we applied a GIS biome layer to exclude  
319 non-breeding habitat, such as tundra, open water, desert, and grassland from potential sites of  
320 origin [73].

321

## 322 **Predicting the origin of migrating *Accipiter striatus***

323 Because of isotope discrimination during feather formation and other effects, the isotope values  
324 of feathers may not directly reflect the stable hydrogen and oxygen isotopic composition of the  
325 environmental water at the site where they are formed [74–75]. We estimated the magnitude of  
326 such discrimination factors for *A. striatus* feathers by calculating the linear relationship between  
327 the isotopic compositions of feathers from museum specimens of known origin ( $\delta^2\text{H}_F$  and  $\delta^{18}\text{O}_F$ )  
328 and the corresponding isoscape predicted precipitation values ( $\delta^2\text{H}_P$  and  $\delta^{18}\text{O}_P$ ) at the location  
329 where the museum specimens were collected [76–78]. Metadata associated with each specimen  
330 included the uncertainty for the collection location in meters. When multiple isoscape derived  
331  $\delta^2\text{H}_P$  and  $\delta^{18}\text{O}_P$  grid values were available within the radius of uncertainty around a collection  
332 location, we used the average isotope values within this radius.

333 The parameters of the linear regression equations derived from the museum specimens  
334 data were used to predict the isotopic composition of the precipitation at the site of origin of  
335 birds sampled at each of the two migratory banding sites (GGRO and Goshutes). The feather  
336 isotopic compositions of the migrating birds represented the variable  $x$  while  $y$  represented an  
337 estimate of the associated  $\delta^2\text{H}_P$  or  $\delta^{18}\text{O}_P$  values. Resulting  $\delta^2\text{H}_P$  and  $\delta^{18}\text{O}_P$  values thus  
338 represented the water source isotope compositions expected for the localities where the feathers

339 of migrating birds were formed. The linear regressions were used as a transfer function to  
340 convert feather isotope values for migratory birds to precipitation isotopes values at the sites of  
341 origin [79]. Many researchers examining the relationship between feather and precipitation  
342 isotopes plot precipitation on the x axis and feather isotopes on the y axis as the dependent  
343 variable, creating a feather isoscape [39, 40, 48, 51]. However, we did not feel justified using this  
344 format of regression equation for the transformation lines in our analysis with the sample size of  
345 museum specimens ( $n = 23$ ) across the entire area of interest. Instead we predicted precipitation  
346 from measured feather values and created a precipitation isoscape to predict probability of origin.  
347 For comparison with previous analyses from the literature we have created the regression  
348 equations in the supporting information (S4 Fig).

349 To determine if the origin for birds migrating through the GGRO and Goshutes sites  
350 differed, we examined the data in several ways. First, we calculated the frequency distributions  
351 of the predicted precipitation isotope values for the two migratory banding sites. Second,  $\delta^2\text{H}_F$   
352 and  $\delta^{18}\text{O}_F$  values for each migrant group (GGRO and Goshutes) were compared statistically  
353 using Welches unequal variance T-test which tests the hypothesis that two populations have the  
354 same means. Additionally,  $\delta^2\text{H}_F$  and  $\delta^{18}\text{O}_F$  values for each migrant group (GGRO and Goshutes)  
355 were examined with a Kolmogorov-Smirnov distribution test which tests whether the two  
356 populations have the same distribution.

357 Finally, we utilized the IsoMAP geographic assignment function to produce maps  
358 representing the likelihood of origin for the migrant birds sampled at GGRO and Goshutes. The  
359 assignment function in IsoMAP uses a semi-parametric Bayesian framework to model  
360 probability density surfaces that can be used to determine geographic areas where organic  
361 material, such as bird feathers, were developed [79, 80]. The assignment function requires an

362 observed sample isotopic composition, a standard deviation associated with the environment to  
363 sample transfer, and an isoscape model in IsoMAP that the sample is compared to. For each of  
364 the birds sampled at the GGRO and Goshutes,  $\delta^2\text{H}_\text{P}$  and  $\delta^{18}\text{O}_\text{P}$  values were estimated using the  
365 feather to precipitation linear regressions. The residual standard error (RSE) of each linear  
366 regression was used as the estimate of error (RSE for  $\delta^2\text{H}$  of 18.3‰, and RSE for  $\delta^{18}\text{O}$  of 3.0).  
367 The precipitation isoscape models described above (IsoMAP job key 50333 and 63026, S2 Fig)  
368 [70, 71] were utilized in the assignment function. Additional uncertainty associated with the  
369 precipitation isoscape is automatically included in the assignment algorithm.

370         Rather than creating average probability surfaces for each migratory group though the  
371 bulk sample function, probability surfaces were generated for each individual bird [80]. The  
372 individual probability density maps were then averaged for GGRO and Goshutes groups. Using  
373 ArcGIS, individual rasters within each group were summed together and then normalized by the  
374 sum of all cell values in the final density surface. This process resulted in geographic  
375 representations of the likely origin of *A. striatus* migrating along the Pacific Coast and the  
376 Intermountain Flyways. Areas outside the species range and nesting habitat type were not  
377 included as likely origin areas of the migratory birds. To examine the accuracy of the linear  
378 transfer functions and the assignment of origin models, we also generated probability density  
379 surfaces for 10 museum samples of known origin (S5 Fig, Table S2). All statistics were  
380 performed in R (R version 2.14.0) [81].

381

## 382 **Results**

383         The stable hydrogen and oxygen isotopic composition of feathers of juvenile *A. striatus*  
384 museum specimens varied from -103.7 to -12.1 ‰ for  $\delta^2\text{H}_\text{F}$  and from 8.62 to 22.22 ‰ for  $\delta^{18}\text{O}_\text{F}$



385 respectively ( $n = 23$ ) (Table 1). A significant and positive relationship was found between the  
386  $\delta^2\text{H}_\text{F}$  and  $\delta^{18}\text{O}_\text{F}$  values from the juvenile feathers ( $R^2 = 0.48$ ,  $P < 0.001$ ,  $y = 5.34(x) - 128.95$ )  
387 (Fig 2).

388 **Fig 2. Relationship between the stable isotope composition of museum specimens of Sharp-**  
389 **shinned Hawks (*Accipiter striatus*).** Stable hydrogen ( $\delta^2\text{H}_\text{F}$  ‰) and oxygen ( $\delta^{18}\text{O}_\text{F}$  ‰) isotope  
390 values for juvenile museum feather specimens ( $n = 23$ ) of known natal origin.  
391

392 We found positive relationships between the feather isotope values and the isoscape  
393 modeled precipitation isotope values for the *A. striatus* museum specimen of known origin. The  
394 linear regression between  $\delta^2\text{H}_\text{F}$  and  $\delta^2\text{H}_\text{P}$  values was statistically significant ( $n = 23$ ,  $R^2 = 0.46$ ,  $P$   
395  $< 0.001$ ,  $y = 0.68x - 43.98$ ,  $\text{RSE} = 18.3\text{‰}$ ) (Fig 3a), while the linear regressions between  $\delta^{18}\text{O}_\text{F}$   
396 and  $\delta^{18}\text{O}_\text{P}$  values based on feathers of juvenile birds (Fig 3b) were not statistically significant ( $n$   
397  $= 23$ ,  $R^2 = 0.14$ ,  $P = 0.07$ ,  $y = 0.39x - 14.67$ ,  $\text{RSE} = 3.0\text{‰}$ ).

398 **Fig 3. Relationship between the stable isotopic compositions of museum feathers and the**  
399 **isoscape model of precipitation.** Stable hydrogen ( $\delta^2\text{H}_\text{F}$  ‰) and oxygen ( $\delta^{18}\text{O}_\text{F}$  ‰) isotopic  
400 composition of feathers for museum Sharp-shinned Hawk (*Accipiter striatus*) specimens of  
401 known natal origin and the isoscape modeled isotopic compositions of precipitation ( $\delta^2\text{H}_\text{P}$  and  
402  $\delta^{18}\text{O}_\text{P}$  ‰) at the collection locations: (a)  $\delta^2\text{H}_\text{F}$  values of birds ( $n = 23$ ) versus  $\delta^2\text{H}_\text{P}$  values, (b)  
403  $\delta^{18}\text{O}_\text{F}$  values of birds ( $n = 23$ ) versus  $\delta^{18}\text{O}_\text{P}$  values.  
404

405 Within the set of migratory birds for which both hydrogen and oxygen isotopic  
406 compositions were measured, there was a positive relationship between  $\delta^2\text{H}_\text{F}$  and  $\delta^{18}\text{O}_\text{F}$  values at  
407 both the GGRO and Goshutes banding sites (Fig 4). The linear relationship between  $\delta^2\text{H}_\text{F}$  and  
408  $\delta^{18}\text{O}_\text{F}$  values for the birds captured at the GGRO was very similar to that found for the museum  
409 bird feathers ( $n = 14$ ,  $R^2 = 0.42$ ,  $P = 0.01$ ,  $y = 6.36x - 146.45$ , Fig 4a). However, the relationship  
410 between  $\delta^2\text{H}_\text{F}$  and  $\delta^{18}\text{O}_\text{F}$  values for the birds migrating through the Goshutes banding site was  
411 not statistically significant ( $n = 7$ ,  $R^2 = 0.18$ ,  $P = 0.34$ ,  $y = 1.02x - 122.29$ , Fig 4b).

412 **Fig 4. Relationships between the stable isotope compositions of feathers from birds trapped**  
413 **along the migratory flyways.** Stable oxygen ( $\delta^{18}\text{O}_F$  ‰) and hydrogen ( $\delta^2\text{H}_F$  ‰) isotope  
414 composition of feathers for juvenile migratory Sharp-shinned Hawk (*Accipiter striatus*)  
415 specimens collected (a) along the Pacific Coast Flyway at the migratory banding site the Golden  
416 Gate Raptor Observatory (GGRO,  $n = 14$ ) and (b) along the Intermountain Flyway at the  
417 migratory banding site Goshute Mountains HawkWatch (Goshutes,  $n = 7$ ).

418  
419 In migratory bird feathers, the range of  $\delta^2\text{H}_F$  values was -105.69 to -4.36 ‰ from the  
420 GGRO ( $n = 15$ ) and -105.40 to -86.60 ‰ at the Goshutes ( $n = 7$ ) (Figure 5a and c, Table 2). The  
421 variation in  $\delta^{18}\text{O}_F$  values was 8.16 to 21.19 ‰ for the GGRO ( $n = 19$ ) and 14.11 to 22.87 ‰ for  
422 the Goshutes ( $n = 10$ ) (Figure 5b and d, Table 2). The mean  $\delta^2\text{H}_F$  values ( $-58.6 \pm 32.7$  ‰  
423 GGRO,  $-95.7 \pm 7$  ‰ Goshutes) were statistically different between the GGRO and Goshutes  
424 sites (Welch's two-sample t-test,  $t = 4.13$ ,  $df = 16.5$ ,  $P < 0.001$ ). There was a significant  
425 difference in the distribution of the  $\delta^2\text{H}_F$  values for the two migratory flyways (Two-sample  
426 Kolmogorov-Smirnov test,  $D = 0.73$ ,  $P = 0.005$ ). Although a subsample of birds captured at the  
427 GGRO site showed  $\delta^{18}\text{O}_F$  depleted values compared to the Goshutes birds, the mean  $\delta^{18}\text{O}_F$  values  
428 ( $14.78 \pm 3.5$  GGRO,  $16.44 \pm 2.7$  Goshutes) did not differ statistically between sites (Welch's  
429 two-sample t-test,  $t = -1.4$ ,  $df = 23.2$ ,  $P = 0.16$ ). Also, we did not detect any significant  
430 difference in the distribution of the  $\delta^{18}\text{O}_F$  values for the migratory flyways (Two-sample  
431 Kolmogorov-Smirnov test,  $D = 0.42$ ,  $P = 0.16$ ).

432 **Fig 5. Frequency distribution of the isoscape modeled isotope compositions of feathers of**  
433 **migratory Sharp-shinned Hawks.** Predicted stable hydrogen ( $\delta^2\text{H}_F$  ‰) and oxygen ( $\delta^{18}\text{O}_F$  ‰)  
434 isotopic compositions of precipitation at the natal origin for migratory Sharp-shinned Hawk  
435 (*Accipiter striatus*) specimens collected (a and b) along the Pacific Coast Flyway at the Golden  
436 Gate Raptor Observatory (GGRO,  $n = 17$ ), and (c and d) along the Intermountain Flyway at the  
437 Goshute Mountains HawkWatch (Goshutes,  $n = 10$ ). Values on the y-axis represent counts of  
438 individual specimens.

439  
440 **Table 2. Stable hydrogen and oxygen isotope composition of feathers of migrating Sharp-**  
441 **shinned Hawks (*Accipiter striatus*) ( $\delta^2\text{H}_F$ , and  $\delta^{18}\text{O}_F$  values (‰)) captured at the Golden Gate**  
442 **Raptor Observatory (GGRO), and at the Goshute Mountains HawkWatch (Goshutes), and**

443 of predicted stable hydrogen and oxygen isotope composition of precipitation ( $\delta^2\text{H}_p$  and  
 444  $\delta^{18}\text{O}_p$  values (‰)) at the migrant's unknown natal origin.  
 445

| Migratory Banding site | <sup>a</sup> Sample Band number | <sup>b</sup> $\delta^2\text{H}_f$ (‰) | <sup>b</sup> $\delta^{18}\text{O}_f$ (‰) | <sup>b, c</sup> $\delta^2\text{H}_p$ (‰) | <sup>b, c</sup> $\delta^{18}\text{O}_p$ (‰) |
|------------------------|---------------------------------|---------------------------------------|------------------------------------------|------------------------------------------|---------------------------------------------|
| GGRO                   | 1363-74740                      | -70.20                                | 14.99                                    | -91.74                                   | -8.90                                       |
|                        | 1353-16673                      | -68.60                                | 16.16                                    | -90.60                                   | -8.45                                       |
|                        | 1162-13236                      | -18.50                                | 20.28                                    | -56.58                                   | -6.86                                       |
|                        | 733-23478                       | -53.50                                | 12.76                                    | -80.37                                   | -9.76                                       |
|                        | 1363-74746                      | -40.70                                | 13.58                                    | -71.67                                   | -9.44                                       |
|                        | 2003-95304                      | -77.50                                | 14.65                                    | -96.66                                   | -9.03                                       |
|                        | 0733-64092                      | -105.69                               | 12.47                                    | -115.69                                  | -9.87                                       |
|                        | 1423-50079                      | -71.40                                | 11.93                                    | -92.54                                   | -10.08                                      |
|                        | 1433-84282                      | -97.44                                | 8.66                                     | -110.24                                  | -11.33                                      |
|                        | 1423-50062                      | -43.30                                | 17.57                                    | -73.44                                   | -7.90                                       |
|                        | 2003-95657                      | -34.73                                | 17.49                                    | -67.60                                   | -7.94                                       |
|                        | 1433-84273                      | -9.04                                 | 13.42                                    | -50.13                                   | -9.50                                       |
|                        | 2003-95656                      | -96.80                                | 8.16                                     | -109.80                                  | -11.53                                      |
|                        | 2003-95572                      | -4.36                                 | 15.67                                    | -46.94                                   | -8.64                                       |
|                        | 2003-95363                      | -87.90                                |                                          | -103.75                                  |                                             |
|                        | 1152-29272                      |                                       |                                          | 16.11                                    | -8.47                                       |
|                        | 2003-95575                      |                                       |                                          | 21.19                                    | -6.51                                       |
|                        | 1363-74737                      |                                       |                                          | 18.86                                    | -7.41                                       |
|                        | 2003-95653                      |                                       |                                          | 15.13                                    | -8.85                                       |
|                        | 1152-29376                      |                                       |                                          | 11.66                                    | -10.18                                      |
| Goshutes               | 1523-88735                      | -102.50                               | 17.04                                    | -113.70                                  | -8.11                                       |
|                        | 1162-71742                      | -95.30                                | 14.70                                    | -108.75                                  | -9.01                                       |
|                        | 1523-88624                      | -105.40                               | 15.18                                    | -115.65                                  | -8.83                                       |
|                        | 1523-88749                      | -86.6                                 | 15.99                                    | -102.87                                  | -8.51                                       |
|                        | 1162-71901                      | -87.50                                | 22.87                                    | -103.51                                  | -5.86                                       |
|                        | 1523-88752                      | -95.00                                | 17.19                                    | -108.59                                  | -8.05                                       |
|                        | 1523-88734                      | -93.90                                | 14.42                                    | -107.84                                  | -9.12                                       |
|                        | 1162-71551                      |                                       | 14.11                                    |                                          | -9.24                                       |
|                        | 1523-88628                      |                                       | 18.36                                    |                                          | -7.60                                       |
|                        | 1162-71547                      |                                       | 14.58                                    |                                          | -9.06                                       |

446 <sup>a</sup> Band numbers represent individual numbers issued by the Bird Banding Laboratory

447 (<http://www.pwrc.usgs.gov/BBL/bblretrv/>)

448 <sup>b</sup> Missing values represent feathers where there was not enough sample from one specimen for both hydrogen and  
 449 oxygen analysis.

450 <sup>c</sup> The  $\delta^2\text{H}_p$  values were predicted using the linear regression equation  $\delta^2\text{H}_p = 0.68 * \delta^2\text{H}_f - 43.98$  (RSE = 18.3‰).

451 The  $\delta^{18}\text{O}_p$  values were predicted using the linear regression equation  $\delta^{18}\text{O}_p = 0.39 * \delta^{18}\text{O}_f - 14.67$  (RSE = 3.0‰).

452

453 The predicted  $\delta^2\text{H}_p$  values for migratory birds from the GGRO banding site varied

454 between -46.94 and -115.69 ‰ (Table 2). The average of these probability density surfaces

455 shows that the origin of the individuals captured along the Pacific Coast Flyway are most likely

456 from eastern CA, Oregon (OR), and Washington (WA) as well as some forested areas within

457 NV, Utah (UT), Colorado (CO), Montana (MT), Idaho (ID), Wyoming (WY), British Columbia  
458 (Canada), and southern Alaska (AK) (Fig 6a). For the birds that migrated through the Goshutes  
459 banding site, the predicted  $\delta^2\text{H}_\text{P}$  values were less varied than at the GGRO, ranging between -  
460 102.87 and -115.65‰ (Table 2). The average probability density surface suggests that  
461 Intermountain Flyway captured birds originated from a smaller area focused primarily in eastern  
462 WA, WY, MT, ID, British Columbia (Canada), and in southern AK (Fig 6c). The  $\delta^2\text{H}_\text{P}$   
463 probability surfaces generated for museum samples of known origin showed a high to medium  
464 probability of prediction for the correct localities for almost all the specimens, except for a  
465 specimen from the western slope of the Rocky Mountains in ID (S5 Fig).

466 **Fig 6. Probability density maps of the origin of migrating juvenile Sharp-shinned Hawks**  
467 **(*Accipiter striatus*).** Maps are based on predicted  $\delta^2\text{H}_\text{P}$  values (‰) (left panels) and predicted  
468  $\delta^{18}\text{O}_\text{P}$  values (‰) (right panels) for birds captured (a and b) along the Pacific Coast Flyway at the  
469 Golden Gate Raptor Observatory (GGRO) and (c and d) along the Intermountain Flyway at the  
470 Goshute Mountains HawkWatch (Goshutes). Each map represents the mean of probability  
471 density surfaces created for individual birds sampled at a location and by isotope group. State  
472 and country boundaries are from public domain GIS files US Census Bureau (2016) and Natural  
473 Earth (2020). Species range acquired with permission from BirdLife International and  
474 NatureServe (2015), and data to create the GIS biome layer acquired from Brown, Bennan, and  
475 Unmack (2007).

476  
477 Isoscape predicted  $\delta^{18}\text{O}_\text{P}$  values at the natal/breeding sites of the birds captured at the  
478 GGRO site ranged between -6.51 and -11.53‰ (Table 2). The average probability density  
479 surface for birds captured along the Pacific Coast Flyway showed that the natal origins were  
480 most likely from eastern CA, OR, NV, UT, CO, MT, WA, coastal British Columbia (Canada)  
481 and southern AK (Fig 6b). These predicted origins, in general, confirmed the data found from the  
482  $\delta^2\text{H}$  analysis. Predicted  $\delta^{18}\text{O}_\text{P}$  values at the origin sites of the birds captured at the Goshutes  
483 ranged from -5.86 to -9.24‰ (Table 2). The average probability density surface based on oxygen  
484 isotope composition located the natal origins of birds from the Intermountain Flyway in more  
485 coastal and southern areas than those from the  $\delta^2\text{H}$  analysis, including CA, NV, UT, CO, OR,

486 WA, British Columbia (Canada), and small portions of AK (Fig 6d). Similar to hydrogen the  
487  $\delta^{18}\text{O}_\text{P}$  probability density surfaces generated for museum samples of known origin showed high  
488 to medium to medium probability of prediction for most specimens, but showed low probability  
489 of origin for two specimens collected along the western slope of the Rocky Mountains in ID and  
490 WA, and a specimen collected from the southern coast of AK (S5 Fig).

491

## 492 **Discussion**

493 Results from the combined SIA of hydrogen and oxygen of *A. striatus* feathers showed  
494 that some raptors migrating along the Pacific Coast Flyway have origins that overlap with those  
495 of raptors migrating along the Intermountain Flyway. Our prediction that juvenile birds that  
496 traveled along each migratory route would come from different and non-overlapping  
497 breeding/natal origins was therefore not supported. Instead it appears that migratory *A. striatus*  
498 juveniles, specifically those that travel along the Pacific Coast Flyway may come from both west  
499 of the Sierra Nevada mountain range and from the northern Rocky Mountain Range and western  
500 interior regions of North America (Fig 6).

501 This outcome should be taken into consideration for conservation of *A. striatus* in  
502 western North America, as individual populations may not show specific adaptations or fidelity  
503 for movement along a single migratory flyway [7, 10, 11]. Instead, adjustments to their migration  
504 strategy may depend on a multitude of ecological factors, such as minimization of energy cost  
505 and mortality risk [82]. Juvenile raptors have also been found to have a greater degree of  
506 variation in their migratory movement than adults [83], perhaps leading juvenile *A. striatus* to  
507 wander between flyways during their first migration. As a result, movement across multiple

508 flyways should be heeded when examining data from migratory watch and banding sites, and  
509 when using this data to estimate population size and fluctuations.

510 In agreement with previous studies, we found that both stable hydrogen and oxygen  
511 isotopic composition of feathers can be used to predict the origin of birds across broad spatial  
512 scales [39, 40]. However, the methodology based on oxygen had, in general, less predictive  
513 power than the one based on hydrogen. Within the overall findings of natal origins for the birds  
514 migrating along western migratory flyways in North America, some differences were found in  
515 the predicted natal sites depending on which isotope and migratory route were examined.

516

## 517 **Assignment of origin**

518 We found an overlap in natal origin of *A. striatus* for the Flyways based on hydrogen and oxygen  
519 isoscapes (Fig 6). Birds migrating along the Pacific Coast Flyway originated from a larger area  
520 that covered both the coastal and central areas of the species' western range while *A. striatus*  
521 migrating along the Intermountain Flyway had a more limited geographical origin.

522 Results from both hydrogen and oxygen isotopes point to similar predicted natal areas for  
523 *A. striatus* migrating along the Pacific Coast Flyway (Fig 6a and b) in forest sites in CA, NV,  
524 OR, WA, ID, and British Columbia (Canada). The origins of the migrants from the  
525 Intermountain Flyway predicted from the oxygen isoscape also included forests in the Sierra  
526 Nevada and Cascade mountains, spanning through CA, OR, and WA up into British Columbia  
527 (Fig 6d). This expands the natal territory of the migratory individuals from the Intermountain  
528 Flyway westward from the hypothesized origins, placing them closer to the west coast of North  
529 America, and creates substantial overlap with the natal origins of those from the Pacific Coast  
530 Flyway. In contrast, the origin sites for the Intermountain Flyway indicated using the hydrogen

531 isoscape lie along our predicted areas of natal origin, and agree with previously published  
532 hydrogen data from Lott and Smith [51], which identified forests in the states of ID, MT, and  
533 British Columbia as origins for *A. striatus* migrating through this flyway (Fig 6c). As a result, the  
534 hydrogen isoscape revealed overlap in the origins of the two flyways only in the central areas of  
535 the species western range. Modeled high probability of origin for *A. striatus* from  $\delta^2\text{H}$  data was  
536 also found for regions associated with the central migration flyway, including the central  
537 Canadian provinces of Alberta and Saskatchewan for both Flyways; but it is unclear if these  
538 values represent a true signal of origin or the lack of differentiation of  $\delta^2\text{H}_\text{P}$  values found in the  
539 central northern plains of North America [84]. The origin sites predicted using the oxygen  
540 isoscape data do not show the same high probability for either Flyway. An examination of the  
541 predicted origin of known museum samples did show low probability of origin for some  
542 specimens collected in ID and eastern WA for oxygen, suggesting that there may be bias in the  
543 assignment of origin from  $\delta^{18}\text{O}$  data for that area (S5 Fig). The weak relationship between the  
544 migrant's  $\delta^2\text{H}_\text{F}$  and  $\delta^{18}\text{O}_\text{F}$  values may account for these discrepancy (Fig 4). However, weak  
545 correlations between  $\delta^2\text{H}_\text{F}$  and  $\delta^{18}\text{O}_\text{F}$  have not hindered previous studies that looked at the origin  
546 of birds in Europe and Asia [40], and the assignment of origin tests showed high probability for  
547 museum specimens with both hydrogen and oxygen in other areas of the species western range.

548         The successful use of SIA of hydrogen and oxygen to assign sites of origin for migratory  
549 animals depends on understanding the relationship between isotopic composition in tissues and  
550 the isotopic composition of waters sources within the landscape where these tissues were formed.  
551 Isotopic composition of animal tissues are offset from environmental isotope values due to a  
552 variety of discrimination factors that differ for each element [85]. These discrimination processes  
553 vary among specific isotopes. In this study, the relationship between the stable hydrogen and

554 oxygen isotope composition of feathers differed depending on sampling locality. This  
555 relationship was stronger for both museum specimens of known origin ( $R^2 = 0.48$ ) and birds  
556 migrating through the Pacific Coast Migratory Flyways ( $R^2 = 0.42$ ) (Fig 2 and Fig 4a), than for  
557 birds traveling along the Intermountain Flyway ( $R^2 = 0.18$ ) (Fig 4b). Research on other species  
558 of vertebrates that compared  $\delta^{18}\text{O}$  and  $\delta^2\text{H}$  values in feathers, claws, or hair have also found  
559 varied correlation patterns between the two isotopic compositions. Significant correlations  
560 between  $\delta^{18}\text{O}$  and  $\delta^2\text{H}$  values were found for insectivorous passerines ( $R^2 = 0.34$ ) [39] and  
561 falcons ( $R^2 = 0.64$  and  $R^2 = 0.48$ )[86, 48], as well as for herbivorous mammals ( $R^2 = 0.84$ , and  
562  $0.57$ ) [37]. However, no significant correlations were found between tissue oxygen and hydrogen  
563 isotope compositions for other vertebrate species, including Pumas (*Puma concolor*) [37] and  
564 European Cranes (*Grus grus*) [40]. Our study is the first to report that birds of the same species  
565 sampled along different migrating routes can show different relationships between  $\delta^2\text{H}_\text{F}$  and  
566  $\delta^{18}\text{O}_\text{F}$  values.

567         The small sample size of birds captured along the Intermountain Flyways may also  
568 account for the poor relationship between the stable hydrogen and oxygen isotope composition in  
569 feathers. These samples were restricted to a single year of migratory data to coincide with  
570 sampling strategy of published genetic data and ensure that all the birds sampled belonged to the  
571 previously characterized *A. striatus* western population [53]. It may be possible that the  
572 individuals analyzed here represented a divergence from the average value for the site that could  
573 have been detected with a larger sample size [48]. However, the predicted origins from our  
574 assignments based on hydrogen isotopes align very closely with previously published work for  
575 *A. striatus* from the same flyway also based on hydrogen isotopes [51]. This suggests that despite  
576 a small sample size, our results agree with previous findings of origin of birds from the



577 Intermountain Flyway. In general, increasing the migrant sample sizes from both flyways may  
578 improve the precision in assigning birds to geographic origin. In addition, obtaining similar  
579 results from multiple isotopes over multiple years would provide greater confidence in origin  
580 maps for migratory species and are worth pursuing in future studies.

581 In summary, birds caught along the Pacific Coast Flyway have origins that overlap with  
582 those birds caught along the Intermountain Flyway, consistent with the absence of population  
583 genetic structure in mitochondrial sequence data among juveniles sampled on these flyways.  
584 However, overlapping regions of origin for migrating juveniles does not preclude the possibility  
585 of fine-scale population structure among regions, as has been seen in other raptors in western  
586 North America [54, 87]. Overall birds that originate from the Rocky Mountain Range of North  
587 America appear to choose to travel through either migration route, but discrepancies in the  
588 predicted origins based on hydrogen and oxygen isotopes encourage caution, and further studies  
589 in how *A. striatus* migrate in western North America.

590

## 591 **Feather isotope composition and life history factors**

592 Our understanding is still poor about why the strong correlation between  $\delta^{18}\text{O}$  and  $\delta^2\text{H}$   
593 values in meteoric (source) water [44] breaks down in the tissues of different groups of  
594 vertebrates. Isotopic variability has been observed in  $\delta^2\text{H}_F$  values for wild American Kestrels  
595 (*Falco sparverius*) at a local scale [60], and in  $\delta^2\text{H}_F$  and  $\delta^{18}\text{O}_F$  values in laboratory-controlled  
596 groups of House Sparrows (*Passer domesticus*) [77] and Japanese Quail (*Cortunix japonica*)  
597 [88]. This variability is thought to be due to differences in diet and water requirements, seasonal  
598 timing of water use, metabolism, and evaporative cooling effects, among other factors [88, 89].

599           A variety of factors may have contributed to the different predictive ability of  $\delta^{18}\text{O}_F$  and  
600  $\delta^2\text{H}_F$  values in *A. striatus*. Carnivorous animals, including birds, are known to show more  
601 positive  $\delta^2\text{H}$  bone collagen values compared to  $\delta^2\text{H}$  source water values [90], and hydrogen  
602 isotopic composition in organic tissue seems to be influenced more by the diet consumed than  
603 the water used, compared to the oxygen isotopic composition in the same tissue [78, 88, 89, 91].  
604 Oxygen isotopic composition may also be affected by atmospheric and dissolved oxygen in body  
605 water, in addition to diet and environmental water [89]. In addition, consuming prey from  
606 different trophic levels (herbivores vs. insectivores) might affect the hydrogen and oxygen  
607 isotopic compositions differently for a raptor such as *A. striatus*. Elevation may also affect the  
608  $\delta^2\text{H}_P$  values [92], and changes in elevation performed during seasonal movement may result in  
609 different isotopic compositions than expected [93]. Climatic factors may also play a role in the  
610 development of different isotopic compositions for raptorial birds from different habitats on the  
611 continent. Climate and aridity can have profound effects on the degree of variation  
612 (fractionation) of water  $\delta^{18}\text{O}$  values measured in animal body water [86, 94, 95], as well as the  
613 proportion of drinking versus metabolically produced water in the body-water pool [88].  
614 Moreover, previous work analyzing isotopic information for a variety of raptor species across  
615 North America found  $\delta^2\text{H}_F$  enriched values for birds from the northern ranges of the Rocky  
616 Mountains in ID and MT compared to  $\delta^2\text{H}_P$  values at the same locations [51]. More work is  
617 needed examining the effects of diet and climate on isotopic compositions for birds from  
618 different trophic levels to determine if prey, habitat, or both, may play a role in variation in  $\delta^2\text{H}$   
619 and  $\delta^{18}\text{O}$  values.

620           The age of the animal has also been found to have a significant effect on the  $\delta^2\text{H}_F$  value  
621 for birds, with adults showing more positive isotopic compositions relative to younger animals

622 [61, 96–97]. Previous studies on breeding populations of known origin suggest a link between  
623 high variability in adult  $\delta^2\text{H}_F$  values, and breeding behavior and physiological effort during the  
624 breeding season [60, 62]. Little work has been done using oxygen variation to determine origin  
625 of birds from different age classes. While we did not assess the origin of adult *A. striatus*  
626 migratory samples, our results for museum samples of known origin are similar between  $\delta^{18}\text{O}_F$   
627 and predicted  $\delta^{18}\text{O}_P$  for adult and juvenile *A. striatus* (S3 Fig). Perhaps  $\delta^{18}\text{O}_F$  values of adult  
628 predatory birds may not be affected by the enrichment seen in tissue  $\delta^2\text{H}$ , possibly because  $\delta^{18}\text{O}$   
629 values are more strongly influenced by environmental water than diet [89], and are not as  
630 affected by evaporative, metabolic, and respiratory water losses [62].

631         Research focused on the relationship between the known origin of a bird, its  
632 physiological condition, aspects of its behavior, and its diet and drinking regime will no doubt  
633 improve our understanding of what “sets” the oxygen and hydrogen isotope composition in  
634 feathers. In addition, previous work has identified that the determination of origin for species of  
635 various trophic levels is improved when species specific calibration curves for hydrogen are  
636 included [48, 98]. Ideally, species specific fractionation factors for hydrogen and oxygen  
637 isotopes should be considered along with isotopic variation observed in birds due to differences  
638 in age and trophic level. Further research that examines how these variables affect the  
639 fractionation factors for hydrogen and oxygen isotope analyses will be essential before we can  
640 use hydrogen or oxygen as a reliable tool for examining the origin of all birds. The results from  
641 this study on *A. striatus* are encouraging.

642

643 **Uncertainties in isoscape modeling methodology**

644 IsoMAP allows users to create and test large scale models of spatial isotopic variation for  
645 a specific area of interest. IsoMAP also allows creation of probability density maps to show  
646 uncertainty due to sample variability. It is known that predictions based on isoscape modeling  
647 methodology might be affected by several factors. The isoscapes created for this study in  
648 IsoMAP.com are based on precipitation isotope ratio values collected through a global network  
649 of stations [68, 70, 71]. Although the global sampling of precipitation isotope ratios used for the  
650 isoscape predictions is spatially and temporally uneven, the coverage in North America is more  
651 thorough than in other areas [66]. Therefore, the trends of  $\delta^2\text{H}_\text{P}$  and  $\delta^{18}\text{O}_\text{P}$  values can be  
652 relatively robust on large scales, but they may not capture the variability present at more limited  
653 spatial or temporal scales [67]. This can make attribution challenging or less precise.

654 Other sources of uncertainty in precipitation isotope values modeled using isoscapes are  
655 due to large grid sizes, the integration of isotope data over multiple years, and the interpolation  
656 model error. Collection location uncertainty, especially for museum specimens that may have a  
657 location description that is not geographically specific, should also be taken into account. Spatial  
658 and temporal resolution could be improved by the addition of quality precipitation isotope data to  
659 the existing network through platforms like IsoMAP [67].

660

## 661 **Conclusion**

662 Our assignment evaluation demonstrates that the hypothesis that juvenile migratory *A.*  
663 *striatus* birds caught along two distinct migration routes on opposite sides of the Sierra Nevada  
664 Mountains of North America (Pacific Coast and Intermountain Migratory Flyways) come from  
665 different natal populations can be rejected (Fig 6). We found an overlap in the assigned natal  
666 territories of the migrating birds from the two migration routes. Birds captured along the Pacific

667 Coast Flyway had a range of  $\delta^2\text{H}_F$  and  $\delta^{18}\text{O}_F$  values that were consistent with precipitation found  
668 not only along the west coast, but also in the western interior regions in the US and Canada. The  
669 birds migrating along the Intermountain Flyway had a more limited geographical origin that also  
670 differed if predicted based on SIA of hydrogen or oxygen. The methodology based on oxygen  
671 appeared to have less predictive power than the one based on hydrogen perhaps because of the  
672 weaker relationships linking feather oxygen isotope ratios to those in precipitation.

673 We conclude that juvenile migrating *A. striatus* in western North America do not  
674 differentiate into fully separate migratory populations. For this difficult-to-track and secretive  
675 breeding raptor, our data can provide clues to the origins of birds caught along these two  
676 migration routes, and that consideration must be given to both flyways when examining changes  
677 in population size at breeding origins, especially along the Rocky Mountain Range and in the  
678 interior western regions of the species' range. However, further work will need to be done, with  
679 larger sample sizes, to determine what may be driving the lack of correlation found between the  
680 feather hydrogen and oxygen stable isotope compositions of *A. striatus* that migrate through the  
681 Intermountain Flyway.

682 Results from this study corroborate previous work showing that feather isotopes can be  
683 useful for identifying sites of origin for migrating birds, but also highlight that caution must be  
684 taken when interpreting the outcome, especially if derived by the stable oxygen isotope  
685 composition of feathers. Detailed studies on the sources of isotope variation at stages along the  
686 path of ingestion and assimilation of water into body tissues, including different trophic levels,  
687 life history stages, and geographic complexity, could provide insight for a wider application of  
688 SIA of hydrogen and oxygen to track movement of different organisms, and especially wild  
689 populations. Identification of natal and breeding habitats has important conservation

690 implications, specifically because the movement of migratory species can often span across large  
691 geographic areas and international borders. Organization of conservation efforts for such species  
692 requires a precise understanding of movement patterns and connections between breeding sites,  
693 migratory pathways, and wintering grounds. The continual development and testing of intrinsic  
694 methods, such as stable isotopes, to track animals using feathers or hair can greatly improve our  
695 insight into how animals, such as raptors like *A. striatus*, travel and move across their ranges.

696

## 697 **Acknowledgements**

698 This research is an outgrowth of a project for the class *Stable Isotope Ecology* taught at the  
699 University of California, Berkeley (by T.E. Dawson and S. Mambelli). We thank Hiromi Uno and  
700 Tami Mau for helpful discussion that improved this research, and Paul D. Brooks and Wenbo  
701 Yang for their assistance with IRMS analyses. We thank the following museums and migratory  
702 sites for all of their hard work collecting and providing us with feathers for this study: CAS,  
703 CRCM, MVZ, SDNHM, UWYMV, GGRO, and HawkWatch International Goshutes banding  
704 station. This is contribution #141 for the Golden Gate Raptor Observatory.

705

706

## 707 **References**

- 708 1. Rappole JH. *The Avian Migrant: The Biology of Bird Migration*. New York; Columbia  
709 University Press; 2013.
- 710 2. Both C, Visser ME. Adjustment to climate change is constrained by arrival date in a  
711 long-distance migrant bird. *Nature*. 2001; 411: 296–298.  
712 <https://doi.org/10.1038/35077063>.
- 713 3. Sillett TS, Holmes RT. Variation in survivorship of a migratory songbird throughout its  
714 annual cycle. *J Anim Ecol*. 2002; 71: 296–308; [https://doi.org/10.1046/j.1365-](https://doi.org/10.1046/j.1365-2656.2002.00599.x)  
715 [2656.2002.00599.x](https://doi.org/10.1046/j.1365-2656.2002.00599.x).
- 716 4. Baker AJ, Gonzalez PM, Piersma T, Niles LJ, de Lima Serrano do Nascimento I,  
717 Atkinson PW, et al. Rapid population decline in red knots: fitness consequences of  
718 decreased refuelling rates and late arrival in Delaware Bay. *Proc Biol Sci*. 2004; 271:  
719 875–882. <https://doi.org/10.1098/rspb.2003.2663>.
- 720 5. Bildstein KL, Smith JP, Yosef R. *Migration Counts and Monitoring*. Raptor Research and  
721 Management Techniques. Bird D M, Bildstein KL, editors. Blaine (WA): Hancock House  
722 Publishing; 2007. p.101–116.

- 723 6. Newton I. The Migration Ecology of Birds. Boston (MA): Academic Press; 2008. p.19–  
724 41.
- 725 7. Berthold P, Helbig AJ. The genetics of bird migration - stimulus, timing, and direction.  
726 Ibis. 1992; 134: 35–40. <https://doi.org/10.1111/j.1474-919X.1992.tb04731.x>.
- 727 8. Pulido F, Berthold P, Mohr G, Querner U. Heritability of the timing of autumn migration  
728 in a natural bird population. Proc R Soc Lond B Biol Sci. 2001; 268: 953–959.  
729 DOI: 10.1098/rspb.2001.1602.
- 730 9. Bairlein F, Eikenaar C, Schmaljohann H. Routes to genes: unraveling the control of avian  
731 migration—an integrated approach using Northern Wheatear *Oenanthe oenanthe* as model  
732 organism. J. Ornithol. 2015; 156 (Suppl 1): S3-S14. [https://doi.org/10.1007/s10336-](https://doi.org/10.1007/s10336-015-1224-3)  
733 [015-1224-3](https://doi.org/10.1007/s10336-015-1224-3).
- 734 10. Helbig A. Inheritance of migratory direction in a bird species: a cross-breeding  
735 experiment with SE-and SW-migrating blackcaps (*Sylvia atricapilla*). Behav Ecol  
736 Sociobiol. 1991; 28: 9–12. <https://doi.org/10.1007/BF00172133>.
- 737 11. Berthold PA. Comprehensive theory for the evolution, control and adaptability of avian  
738 migration. Ostrich. 1999; 70: 1–11. <https://doi.org/10.1080/00306525.1999.9639744>.
- 739 12. Hoffman SW, Smith JP, Meehan TD. Breeding grounds, winter ranges, and migratory  
740 routes of raptors in the mountain west. J Raptor Res. 2002; 36: 97–110.
- 741 13. Farmer CJ, Goodrich LJ, Inzunza ER, Smith JP. Conservation status of North America's  
742 birds of prey. In: State of North America's Birds of Prey. Series in Ornithology 3; 2008. p.  
743 303–420.
- 744 14. Farmer CJ, Safi K, Barber DR, Newton I, Martell M, Bildstein KL. Efficacy  
745 of migration counts for monitoring continental populations of raptors: an example using  
746 the osprey (*Pandion haliaetus*). Auk. 2010; 127: 863–870.  
747 <https://doi.org/10.1525/auk.2010.09152>.
- 748 15. Goodrich LJ, Smith JP. Raptor migration in North America. In: State of North America's  
749 Birds of Prey. Series in Ornithology 3; 2008. pp. 37–149.
- 750 16. Nagy AC. Population trend indices based on 40 years of autumn counts at Hawk  
751 Mountain Sanctuary in North-eastern Pennsylvania. In: R. D. Chancellor, editor. World  
752 Conference on Birds of Prey, Vienna Report of Proceedings;. London (UK): International  
753 Council for Bird Preservation;1977. pp. 243-252.
- 754 17. Kjellén N, Roos G. Population trends in Swedish raptors demonstrated by migration  
755 counts at Falsterbo, Sweden 1942–97. Bird Study. 2010; 47: 195–211.  
756 <https://doi.org/10.1080/00063650009461175>.
- 757 18. Panuccio M, Martin B, Morganti M, Onrubia A, Ferrer M. Long-term changes in autumn  
758 migration dates at the Strait of Gibraltar reflect population trends of soaring birds. Ibis.  
759 2017; 159: 55–65. <https://doi.org/10.1111/ibi.12420>.
- 760 19. Studds CE, Kendall BE, Murray NJ, Wilson HB, Rogers DI, Clemens RS, et al. Rapid  
761 population decline in migratory shorebirds relying on Yellow Sea tidal mudflats as  
762 stopover sites. Nat Commun. 2017; 8: 14895. <https://doi.org/10.1038/ncomms14895>.
- 763 20. Faaborg J, Holmes RT, Anders AD, Bildstein KL, Dugger KM, Gauthreaux SAJ, et al.  
764 Conserving migratory land birds in the New World: Do we know enough? Ecol Appl.  
765 2010; 20: 398–418. <https://doi.org/10.1890/09-0397.1>.
- 766 21. Bildstein KL, Meyer K. Sharp-shinned Hawk (*Accipiter striatus*). In: Poole A, Gill F,  
767 editors. The Birds of North America. Philadelphia (PA): The Birds of North America,

- 768 Inc.; 2000. No. 482, [https://birdsna.org/Species-](https://birdsna.org/Species-Account/bna/species/shshaw/introduction)  
769 [Account/bna/species/shshaw/introduction](https://birdsna.org/Species-Account/bna/species/shshaw/introduction).
- 770 22. Bent AC. Life Histories of North American Birds of Prey, Order Falconiformes (Part 1).  
771 United States National Museum, Bulletin. 1937; 167: 95-111.  
772 <https://doi.org/10.5479/si.03629236.167.i>.
- 773 23. Carlson JE, Piiro DD, Keane JJ, Gill SJ. Estimating site occupancy and detection  
774 probabilities for Cooper's and Sharp-Shinned Hawks in the Southern Sierra Nevada. J  
775 Raptor Res. 2015; 49: 450–457. <https://doi.org/10.3356/rapt-49-04-450-457.1>.
- 776 24. Bildstein KL. A Brief History of Raptor Conservation in North America. In: State of  
777 North America's Birds of Prey. Series in Ornithology 3; 2008. pp. 5-36.
- 778 25. Palmer RS. Sharp-shinned Hawk *Accipiter striatus*. In: Handbook of North American  
779 Birds; New Haven and London (UK): Yale University Press; 1988. Volume 4, pp. 304-  
780 319..
- 781 26. Viverette CB, Struve S, Goodrich LJ, Bildstein KL. Decreases in migrating Sharp-  
782 shinned Hawks (*Accipiter striatus*) at traditional raptor-migration watch sites in eastern  
783 North America. Auk. 1996; 113: 32–40. DOI: 10.2307/4088933  
784 <https://www.jstor-org.libproxy.uwyo.edu/stable/4088933>.
- 785 27. Hull AC. Band Recoveries 2007. In: Pacific Raptor Report. 2008; pp. 29: 14 [Cited 2018  
786 13 August]. Available from:  
787 [http://www.parksconservancy.org/assets/programs/ggro/pdfs/pacific-raptor-report-](http://www.parksconservancy.org/assets/programs/ggro/pdfs/pacific-raptor-report-2008.pdf)  
788 [2008.pdf](http://www.parksconservancy.org/assets/programs/ggro/pdfs/pacific-raptor-report-2008.pdf).
- 789 28. Harn L. Band Recoveries 2008-2009. In: Pacific Raptor Report. 2009; 31: 14-20 [Cited  
790 13 August 2018]. Available from:  
791 <http://www.parksconservancy.org/assets/programs/ggro/pdfs/pacific-raptor-report-31.pdf>.
- 792 29. Rubenstein D, Chamberlain C, Holmes R, Ayres M, Waldbauer J, Graves G, et al.  
793 Linking breeding and wintering ranges of a migratory songbird using stable isotopes.  
794 Science. 2002; 295: 1062–1065. DOI: 10.1126/science.1067124.
- 795 30. Clegg S, Kelly J, Kimura M, Smith T. Combining genetic markers and stable isotopes to  
796 reveal population connectivity and migration patterns in a Neotropical migrant, Wilson's  
797 Warbler (*Wilsonia pusilla*). Mol Ecol. 2003; 12: 819–830. [https://doi.org/10.1046/j.1365-](https://doi.org/10.1046/j.1365-294X.2003.01757.x)  
798 [294X.2003.01757.x](https://doi.org/10.1046/j.1365-294X.2003.01757.x).
- 799 31. Rubenstein D, Hobson K. From birds to butterflies: animal movement patterns and stable  
800 isotopes. Trends Ecol Evol. 2004; 19: 256–263.  
801 <https://doi.org/10.1016/j.tree.2004.03.017>.
- 802 32. Boulet M, Norris DR. Introduction: The past and present of migratory connectivity.  
803 Ornithol Monogr. 2006; pp. 1–13. DOI: 10.2307/40166835  
804 <https://www.jstor.org/stable/40166835>.
- 805 33. Inger R, Bearhop S. Applications of stable isotope analyses to avian ecology. Ibis. 2008;  
806 150: 447–461. <https://doi.org/10.1111/j.1474-919X.2008.00839.x>.
- 807 34. Rushing CS, Ryder TB, Saracco JF, Marra PP. Assessing migratory connectivity for a  
808 long-distance migratory bird using multiple intrinsic markers. Ecol Appl. 2014; 24: 445–  
809 456. <https://doi.org/10.1890/13-1091.1>.
- 810 35. Seifert N, Haase M, Van Wilgenburg SL, Voigt CC, Schmitz Ornés A. Complex  
811 migration and breeding strategies in an elusive bird species illuminated by genetic and  
812 isotopic markers. J Avian Biol. 2015; 47: 275–287. <https://doi.org/10.1111/jav.00751>.



- 813 36. Hobson KA. Isotope Landscapes for Terrestrial Migration Research. In: Hobson KA,  
814 Wassenaar LI, editors. Tracking Animal Migration with Stable Isotopes, 1st ed. London  
815 (UK): Academic Press; 2008; Volume 2: pp.79-106..
- 816 37. Pietsch, S. J., Hobson, K. A., Wassenaar, L. I., and Tütken, T. Tracking Cats: Problems  
817 with Placing Feline Carnivores on  $\delta^{18}\text{O}$ ,  $\delta\text{D}$  Isoscapes. PLoS ONE 2011, 6, e24601–11,  
818 <https://doi.org/10.1371/journal.pone.0024601>.
- 819 38. Soto DX, Wassenaar LI, Hobson KA. Stable hydrogen and oxygen isotopes in aquatic  
820 food webs are tracers of diet and provenance. *Funct Ecol.* 2013; 27: 535–543.  
821 <https://doi.org/10.1111/1365-2435.12054>.
- 822 39. Hobson KA, Koehler G. On the use of stable oxygen isotope ( $\delta^{18}\text{O}$ ) measurements for  
823 tracking avian movements in North America. *Ecol Evol.* 2015; 5: 799–806.  
824 <https://doi.org/10.1002/ece3.1383>.
- 825 40. Pekarsky S, Angert A, Haese B, Werner M, Hobson KA, Nathan R. Enriching the  
826 isotopic toolbox for migratory connectivity analysis: a new approach for migratory  
827 species breeding in remote or unexplored areas. *Divers Distrib.* 2015; 21: 416–427.  
828 <https://doi.org/10.1111/ddi.12306>.
- 829 41. Rozanski K, Araguas-Araguas L, Gonfiantini R. Isotopic patterns in modern global  
830 precipitation. In: Swart PK, Lohmann KC, McKenzie J, Savin S. editors. *Climate Change  
831 in Continental Isotopic Records*. Washington, DC: Am. Geophys. Union; 1993. Volume  
832 78: pp. 1–36.
- 833 42. Epstein S, Mayeda T. Variation of O-18 content of waters from natural sources. *Geochim  
834 Cosmochim Acta.* 1953; 4: 213-224. [https://doi.org/10.1016/0016-7037\(53\)90051-9](https://doi.org/10.1016/0016-7037(53)90051-9).
- 835 43. Friedman I. Deuterium content of natural water and other substances. *Geochim  
836 Cosmochim Acta.* 1953; 4: 89-103. [https://doi.org/10.1016/0016-7037\(53\)90066-0](https://doi.org/10.1016/0016-7037(53)90066-0).
- 837 44. Craig H. Isotopic variations in meteoric waters. *Science.* 1961; 133: 1702–1703. DOI:  
838 [10.1126/science.133.3465.1702](https://doi.org/10.1126/science.133.3465.1702).
- 839 45. Dansgaard W. Stable isotopes in precipitation. *Tellus.* 1964; 16: 436–468.  
840 <https://doi.org/10.3402/tellusa.v16i4.8993>.
- 841 46. Bowen GJ. Isoscapes: spatial pattern in isotopic biogeochemistry. *Annu Rev Earth Planet  
842 Sci.* 2010; 38: 161-187. <https://doi.org/10.1146/annurev-earth-040809-152429>.
- 843 47. Meier-Augenstein W, Hobson KA, Wassenaar LI. Critique: measuring hydrogen stable  
844 isotope abundance of proteins to infer origins of wildlife, food and people. *Bioanalysis.*  
845 2013; 5: 751–767. <https://doi.org/10.4155/bio.13.36>.
- 846 48. Hobson K, DeMent S, Van Wilgenburg S, Wassenaar L. Origins of American Kestrels  
847 wintering at two southern US sites: an investigation using stable-isotope ( $\delta\text{D}$ ,  $\delta^{18}\text{O}$ )  
848 methods. *J Raptor Res.* 2009; 43: 325–337. <https://doi.org/10.3356/JRR-08-74.1>.
- 849 49. Storm-Suke A, Wassenaar LI, Nol E, Norris DR. The influence of metabolic rate on the  
850 contribution of stable-hydrogen and oxygen isotopes in drinking water to quail blood  
851 plasma and feathers. *Funct Ecol.* 2012; 26: 1111-1119. doi:10.1111/j.1365-  
852 2435.2012.02014.x.
- 853 50. Smith RB, Meehan TD, Wolf BO. Assessing migration patterns of sharp-shinned hawks  
854 *Accipiter striatus* using stable-isotope and band encounter analysis. *J Avian Biol.* 2003;  
855 34: 387–392. <https://doi.org/10.1111/j.0908-8857.2003.03107.x>.
- 856 51. Lott CA, Smith JP. A geographic-information-system approach to estimating the origin  
857 of migratory raptors in North America using stable hydrogen isotope ratios in feathers.  
858 *Auk.* 2006; 123: 822.

- 859 8038(2006)123[822:AGATET]2.0.CO;2.
- 860 52. Oppel S, Dobrev V, Arkumarev V, Saravia V, Bounas A, Kret E, et al. High juvenile  
861 mortality during migration in a declining population of a long-distance migratory raptor.  
862 *Ibis*. 2015; 157: 545–557. <https://doi.org/10.1111/ibi.12258>.
- 863 53. Hull J, Girman D. Effects of Holocene climate change on the historical demography of  
864 migrating Sharp-shinned Hawks (*Accipiter striatus velox*) in North America. *Mol Ecol*.  
865 2005; 14: 159–170. <https://doi.org/10.1111/j.1365-294X.2004.02366.x>.
- 866 54. Hull JM, Hull AC, Sacks BN, Smith JP, Ernest HB. Landscape characteristics influence  
867 morphological and genetic differentiation in a widespread raptor (*Buteo jamaicensis*).  
868 *Mol Eco*. 2008; 17: 810-824.
- 869 55. Bowen GJ, West JB. Isotope landscapes for terrestrial migration research. In: Hobson  
870 KA, Wassenaar LI, editors. Tracking animal migration with stable isotopes. Amsterdam  
871 (Netherlands): Elsevier; 2008. pp. 79–105.
- 872 56. Pyle P. Identification guide to North American birds, Part II Anatidae to Alcidae. Point  
873 Reyes Station (CA): Slate Creek Press; 2008. pp. 415-419.
- 874 57. Smith A, Donohue K, Dufty A Jr. Intrafeather and intraindividual variation in the stable-  
875 hydrogen isotope ( $\delta D$ ) content of raptor feathers. *Condor*. 2008; 110: 500–506.  
876 <https://doi.org/10.1525/cond.2008.8515>.
- 877 58. Paritte J, Kelly J. Effect of cleaning regime on stable-isotope ratios of feathers in  
878 Japanese quail (*Coturnix japonica*). *Auk*. 2009; 126: 165–174. DOI:  
879 10.1525/auk.2009.07187 <https://www.jstor.org/stable/10.1525/auk.2009.07187>.
- 880 59. Bontempo L, Ceppa F, Ziller L, Pedrini P, Hobson KA, Wassenaar LI, et al. Comparison  
881 of methods for stable isotope ratio ( $\delta^{13}C$ ,  $\delta^{15}N$ ,  $\delta^2H$ ,  $\delta^{18}O$ ) measurements of feathers.  
882 *Methods Ecol Evol*. 2014; 5: 363–371. <https://doi.org/10.1111/2041-210X.12165>.
- 883 60. Greenwood J, Dawson R. Correlates of Deuterium ( $\delta D$ ) enrichment in the feathers of  
884 adult American Kestrels of known origin. *Condor*. 2011; 113: 555–564. DOI:  
885 10.1525/cond.2011.100213 <https://www.jstor.org/stable/10.1525/cond.2011.100213>.
- 886 61. De Ruycck C, Hobson KA, Koper N, Larson KW, Wassenaar LI. An appraisal of the use  
887 of hydrogen-isotope methods to delineate origins of migratory Saw-whet Owls in North  
888 America. *Condor*. 2013; 115: 366–374. <https://doi.org/10.1525/cond.2013.120019>.
- 889 62. Briggs CW, Poulson SR, Collopy MW. Correlation between feather isotopes and body  
890 condition for Swainson's Hawks, and implications for migration studies. *J Raptor Res*.  
891 2017; 51: 107–114. <https://doi.org/10.3356/JRR-15-00002.1>.
- 892 63. Wassenaar LI, Hobson KA. Two new keratin standards ( $\delta^2H$ ,  $\delta^{18}O$ ) for daily laboratory  
893 use in wildlife and forensic isotopic studies, In the 7<sup>th</sup> International Conference on  
894 Applications of Stable Isotope Techniques to Ecological studies. University of Alaska,  
895 Fairbanks, Alaska, USA. 2010.
- 896 64. Soto DX, Koehler G, Wassenaar LI, and Hobson KA. Re-evaluation of the hydrogen  
897 stable isotopic composition of keratin calibration standards for wildlife and forensic  
898 science applications. *Rapid Commun. Mass Spectrom*. 2017; 31: 1193– 1203. <https://doi.org/10.1002/rcm.7893>.
- 899
- 900 65. Wassenaar L, Hobson K. Comparative equilibration and online technique for  
901 determination of non-exchangeable hydrogen of keratins for use in animal migration  
902 studies. *Isotopes Environ Health Stud*. 2003; 39: 211–217.  
903 <https://doi.org/10.1080/1025601031000096781>.
- 904 66. Bowen GJ. Gridded maps of the isotopic composition of meteoric waters. 2019 [cited 28

- 905 June 2020]. Available from:  
906 <http://wateriso.utah.edu/waterisotopes/pages/information/mapping.html>  
907 67. Bowen GJ. Statistical and geostatistical mapping of precipitation water isotope ratios. In:  
908 West JB, Bowen G, Dawson T, Tu K, editors. *Isoscapes: understanding movement,*  
909 *pattern, and process on Earth through isotope mapping*; . Verlag (Netherlands): Springer;  
910 2010. pp. 487.  
911 68. IAEA/WMO Global network for isotopes in precipitation, the GNIP database. 2004.  
912 Available from: [http://www-naweb.iaea.org/napc/ih/GNIP/IHS\\_GNIP.html](http://www-naweb.iaea.org/napc/ih/GNIP/IHS_GNIP.html).  
913 69. Hobson KA. Using stable isotopes to trace long-distance dispersal in birds and other taxa.  
914 *Divers Distrib.* 2005; 11: 157-164. <https://doi.org/10.1111/j.1366-9516.2005.00149.x>.  
915 70. Marrack LC. IsoMAP job key 50333, *Isoscapes Modeling, Analysis and Prediction*  
916 (version 1.0). The IsoMAP Project. 2015. <http://isomap.org>.  
917 71. Marrack LC. IsoMAP job key 63026, *Isoscapes Modeling, Analysis and Prediction*  
918 (version 1.0). The IsoMAP Project. 2017. <http://isomap.org>.  
919 72. BirdLife International and NatureServe. Bird species distribution maps of the world;  
920 BirdLife International. Cambridge (UK) and Arlington: NatureServe. 2015 [cited 15  
921 January 2016].  
922 73. Brown D, Brennan T, Unmack PA. Digitized biotic community map for plotting and  
923 comparing North American plant and animal distributions. *CANOTIA.* 2007; 3: 1.  
924 Available from:  
925 [http://www.canotia.org/volumes/CANOTIA\\_2007\\_Vol3\\_1\\_Brown\\_et\\_al.pdf](http://www.canotia.org/volumes/CANOTIA_2007_Vol3_1_Brown_et_al.pdf).  
926 74. Chamberlain C, Blum J, Holmes R, Feng X, Sherry T, Graves G. The use of isotope  
927 tracers for identifying populations of migratory birds. *Oecologia.* 1996; 109: 132-141.  
928 <https://doi.org/10.1007/s004420050067>.  
929 75. Hobson KA, Wassenaar LI. Linking breeding and wintering grounds of neotropical  
930 migrant songbirds using stable hydrogen isotopic analysis of feathers. *Oecologia.* 1997;  
931 109: 142–148. <https://doi.org/10.1007/s004420050068>.  
932 76. Hobson KA. Using stable isotopes to trace long-distance dispersal in birds and other taxa.  
933 *Divers Distrib.* 2005; 11: 157-164. <https://doi.org/10.1111/j.1366-9516.2005.00149.x>.  
934 77. Martinez del Rio C, Wolf N, Carleton C, Gannes Z. Isotopic ecology ten years after a call  
935 for more laboratory experiments. *Biol Rev Camb Philos Soc.* 2009; 84: 91-111.  
936 <https://doi.org/10.1111/j.1469-185X.2008.00064.x>.  
937 78. Wolf N, Bowen G, Martinez del Rio C. The influence of drinking water on the  $\delta$  D and  
938  $\delta$  18O values of house sparrow plasma, blood and feathers. *J Exp Biol.* 2011; 214: 98–  
939 103, doi: 10.1242/jeb.050211.  
940 79. Bowen GJ, Liu Z, Vander Zanden HB, Zhao L, Takahashi G. Geographic assignment  
941 with stable isotopes in IsoMAP. *Methods Ecol Evol.* 2014; 5: 201-206.  
942 doi:[10.1111/2041-210X.12147](https://doi.org/10.1111/2041-210X.12147)  
943 80. Wunder MB. Using isoscapes to model probability surfaces for determining geographic  
944 origins. In: West J, Bowen G, Dawson T, Tu KP, editors. *Isoscapes; Understanding*  
945 *movement, pattern, and process on Earth through isotope mapping.* Dordrecht  
946 (Netherlands): Springer; 2010. pp. 251–270.  
947 81. R Development Core Team. R: A language and environment for statistical computing. R  
948 Foundation for Statistical Computing. Vienna (Austria). 2011; ISBN 3-900051-07-0,  
949 Available from: <http://www.R-project.org/>.

- 950 82. Hedenström A. Adaptations to migration in birds: behavioral strategies, morphology and  
951 scaling effects. *Philos Trans R Soc Lond B Biol Sci.* 2008; 363: 287-299.  
952 doi:10.1098/rstb.2007.2140.
- 953 83. Sergio F, Tanferna A, De Stephanis R, Jiménez LL, Blas J, Tavecchia G, et al. Individual  
954 improvements and selective mortality shape lifelong migratory performance. *Nature.*  
955 2014; 515: 410-413. doi:10.1038/nature13696.
- 956 84. Bowen GJ, Wassenaar LI, Hobson KA. Global application of stable hydrogen and  
957 oxygen isotopes to wildlife forensics. *Oecologia.* 2005; 143: 337-348.
- 958 85. Hobson K, Barnett-Johnson R, Cerling T. Using isoscapes to track animal migration. In:  
959 West J, Bowen G, Dawson T, Tu KP, editors. *Isoscapes; Understanding movement,*  
960 *pattern, and process on Earth through isotope mapping.* Dordrecht (Netherlands):  
961 Springer; 2010. pp. 273–298. [https://doi.org/10.1007/978-90-481-3354-3\\_13](https://doi.org/10.1007/978-90-481-3354-3_13).
- 962 86. Morganti M, Franzoi A, Bontempo L, Sara M. An exploration of isotopic variability in  
963 feathers and claws of Lesser Kestrel *Falco naumanni* chicks from southern Sicily.  
964 *Avocetta.* 2016; 40: 23–32.
- 965 87. Hull JM, Ernest HV, Harley JA, Fish AM, Hull AC. Differential migration between  
966 discrete populations of juvenile Red-Tailed Hawks (*Buteo jamaicensis*). *Auk.* 2009; 126:  
967 389-396.
- 968 88. Wolf N, Newsome SD, Fogel ML, Martinez del Rio C. The relationship between  
969 drinking water and the hydrogen and oxygen stable isotope values of tissues in Japanese  
970 Quail (*Cortix japonica*). *Auk.* 2013; 130: 323-330. Doi:10.1525/auk.2013.12075.
- 971 89. Vander Zanden HB, Soto DX, Bowen GJ, Hobson KA. Expanding the isotopic toolbox:  
972 applications of hydrogen and oxygen stable isotope ratios to food web studies. *Front Ecol*  
973 *Evol.* 2016; 4: 3741–20. <https://doi.org/10.3389/fevo.2016.00020>.
- 974 90. Birchall J, O'Connell TC, Heaton THE, Hedges REM. Hydrogen isotope ratios in animal  
975 body protein reflect trophic level. *J Anim Ecol.* 2005; 74: 877–881.  
976 <https://doi.org/10.1111/j.1365-2656.2005.00979.x>.
- 977 91. Nielson KE, Bowen GJ. Hydrogen and oxygen in brine shrimp chitin reflect  
978 environmental water and dietary isotopic composition. *Geochim Cosmochim Acta.* 2010;  
979 74: 1812–1822. <https://doi.org/10.1016/j.gca.2009.12.025>.
- 980 92. Hobson KA, Bowen GJ, Wassenaar L, Ferrand Y, Lormee H. Using stable hydrogen and  
981 oxygen isotope measurements of feathers to infer geographical origins of migrating  
982 European birds. *Oecologia.* 2004; 141: 477-488.
- 983 93. Hobson KA, Wassenaar LI, Milá B, Lovette I, Dingle C, Smith TB. Stable isotopes as  
984 indicators of altitudinal distributions and movements in an Ecuadorean hummingbird  
985 community. *Oecologia.* 2003; 136: 302-308.
- 986 94. Kohn MJ. Predicting animal  $\delta^{18}\text{O}$ : accounting for diet and physiological adaptation.  
987 *Geochim Cosmochim Acta.* 1996; 60: 4811–4829. [https://doi.org/10.1016/S0016-](https://doi.org/10.1016/S0016-7037(96)00240-2)  
988 [7037\(96\)00240-2](https://doi.org/10.1016/S0016-7037(96)00240-2).
- 989 95. Crowley BE, Melin AD, Yeakel JD, Dominy NJ. Do oxygen isotope values in collagen  
990 reflect the ecology and physiology of neotropical mammals? *Front Ecol Evol.* 2015; 3:  
991 431–12. <https://doi.org/10.3389/fevo.2015.00127>.
- 992 96. Smith AD, Dufty AM. Variation in the stable-hydrogen isotope composition of Northern  
993 Goshawk feathers: relevance to the study of migratory origins. *Condor.* 2005; 107: 547–  
994 558. [https://doi.org/10.1650/0010-5422\(2005\)107\[0547:VITSIC\]2.0.CO;2](https://doi.org/10.1650/0010-5422(2005)107[0547:VITSIC]2.0.CO;2).
- 995 97. Gow E, Stutchbury B, Done T, Kyser T. An examination of stable hydrogen isotope ( $\delta$

996 D) variation in adult and juvenile feathers from a migratory songbird. *Can J Zool.* 2012;  
997 90: 585–594. <https://doi.org/10.1139/z2012-024>.  
998 98. van Dijk JGB, Meissner W, Klaassen M. Improving provenance studies in migratory  
999 birds when using feather hydrogen stable isotopes. *J Avian Biol.* 2014; 45: 103–108. Doi:  
1000 10.1111/j.1600-048X.2013.00232.x.  
1001  
1002

## 1003 **Supporting Information**

1004 **Table S1: Oxygen stable isotope composition of feathers of adult museum Sharp-shinned**  
1005 **Hawk (*Accipiter striatus*) specimens ( $\delta^{18}\text{O}_f$  values (‰)) ( $n = 25$ ), and isoscape modeled stable**  
1006 **hydrogen and oxygen isotope composition of precipitation ( $\delta^{18}\text{O}_p$  values (‰)) of known**  
1007 **breeding origin.**  
1008

1009 **Table S2: Stable isotopic compositions of museum feathers and estimates of precipitation**  
1010 **isotopes used to test assignment of origin models.** Stable hydrogen ( $\delta^2\text{H}_f$  ‰) and oxygen  
1011 ( $\delta^{18}\text{O}_f$  ‰) isotopic composition of feathers for juvenile museum Sharp-shinned Hawk (*Accipiter*  
1012 *striatus*) specimens of known natal origin and estimated isotopic compositions of precipitation  
1013 ( $\delta^2\text{H}_p$  and  $\delta^{18}\text{O}_p$  ‰) from the transfer functions used to determine assignment of origin. The  
1014 states where samples were collected and the museum Specimen IDs are included.  
1015

1016 **S1 Fig: Map of sample locations for museum specimens of juvenile and adult Sharp-**  
1017 **shinned Hawk (*Accipiter striatus*) feathers.** Sampling locations are shown in reference to the  
1018 species known range in Western North America (light gray), and suitable breeding forest habitat  
1019 (dark gray). Juveniles samples ( $n = 23$ ) are shown as triangles, and adult samples ( $n = 25$ ) are  
1020 shown as circles. State and country boundaries are modified from public domain GIS files, US  
1021 Census Bureau (2016) and Natural Earth (2020). Species range acquired from Birdlife  
1022 International and NatureServe (2015), and data to create the GIS biome layer acquired from  
1023 Brown, Bennan, and Unmack (2007).  
1024

1025 **S2 Fig: Stable hydrogen ( $\delta^2\text{H}_p$  ‰) and oxygen ( $\delta^{18}\text{O}_p$  ‰) isoscapes created within IsoMAP.**  
1026 These were used to determine transfer functions for specimens of known origin and performing  
1027 assignment of origin for migrating specimens. The hydrogen isoscape (A) produced was based  
1028 on 117 stations, had resolution of 9x9 km, a correlation parameter of 0.93, and included the  
1029 variables elevation (ETOPO,  $P < 0.001$ ), latitude ( $P < 0.001$ ) and longitude ( $P = 0.06$ ) (available  
1030 as IsoMAP job key 50333 (Marrack 2015)). The most robust oxygen isoscape (B) was based on  
1031 120 stations, had resolution of 9x9 km, a correlation parameter of 0.92, and included the  
1032 variables elevation (ETOPO,  $P < 0.001$ ), latitude ( $P < 0.001$ ) and longitude ( $P = 0.05$ ) (available  
1033 as IsoMAP job key 63026 (Marrack 2017)).  
1034

1035 **S3 Fig: Relationship between the stable isotopic compositions of museum feathers and the**  
1036 **isoscape model of precipitation for adult and juvenile Sharp-shinned Hawks (*Accipiter***  
1037 ***striatus*).** Stable oxygen ( $\delta^{18}\text{O}_f$  ‰) isotopic composition of feathers for museum Sharp-shinned  
1038 Hawk (*Accipiter striatus*) specimens of known natal/breeding origin and isoscape modeled  
1039 isotopic composition of precipitation ( $\delta^{18}\text{O}_p$  ‰) at the collection locations of (a) juvenile (black

1040 dots) birds as well as (b) adult birds (white dots) ( $n = 48$ ). The linear regression for both juvenile  
1041 and adult birds is  $y = 0.29x - 14.77$ ,  $R^2 = 0.1$ ,  $P = 0.03$  (dashed line). Note that this equation is  
1042 similar in slope and intercept to the linear regression relationship for juvenile birds ( $y = 0.385x -$   
1043  $14.67$  ( $R^2 = 0.14$ ,  $P = 0.07$ ) (solid line)).

1044  
1045 **S4 Fig: Relationship between the stable isotopic compositions of museum feathers and the**  
1046 **isoscape model of precipitation.** Stable hydrogen ( $\delta^2\text{H}_\text{F}$  ‰) and oxygen ( $\delta^{18}\text{O}_\text{F}$  ‰) isotopic  
1047 composition of feathers for museum juvenile Sharp-shinned Hawk (*Accipiter striatus*) specimens  
1048 ( $n = 23$ ) of known natal origin and the isoscape modeled isotopic compositions of precipitation  
1049 ( $\delta^2\text{H}_\text{P}$  and  $\delta^{18}\text{O}_\text{P}$  ‰) at the collection locations: (a)  $\delta^2\text{H}_\text{F}$  values of birds versus  $\delta^2\text{H}_\text{P}$  values, (b)  
1050  $\delta^{18}\text{O}_\text{F}$  values of birds versus  $\delta^{18}\text{O}_\text{P}$  values.

1051  
1052 **S5 Fig: Probability density maps predicting the origin of museum specimens of Sharp-**  
1053 **shinned Hawks (*Accipiter striatus*) with known collection locations.** Maps are based on  
1054 predicted  $\delta^2\text{H}_\text{P}$  values (‰) (left panels) and predicted  $\delta^{18}\text{O}_\text{P}$  values (‰) (right panels) for birds  
1055 captured at known locations. Each map represents the probability density surface created for an  
1056 individual bird with the known sampling location shown by a circle. State and country  
1057 boundaries are from public domain GIS files US Census Bureau (2016) and Natural Earth  
1058 (2020). Species range acquired from BirdLife International and NatureServe (2015), and data to  
1059 create the GIS biome layer acquired with permission from Brown, Bennan, and Unmack (2007).

1060  
1061  
1062  
1063  
1064

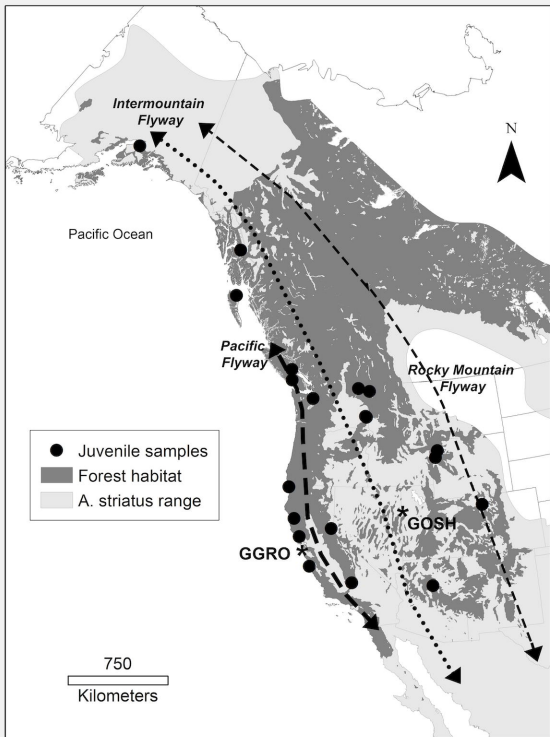

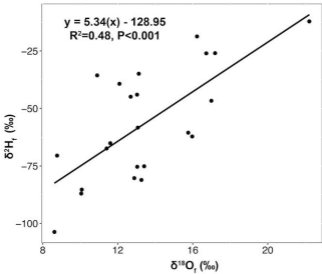



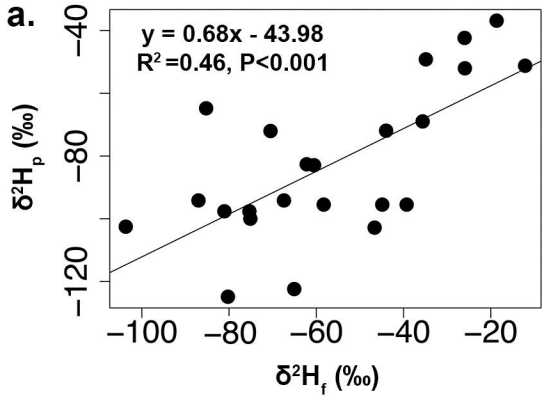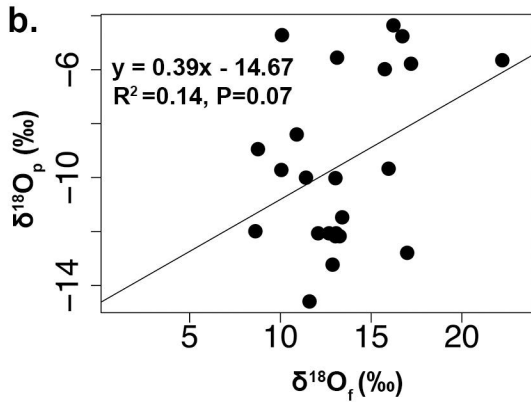

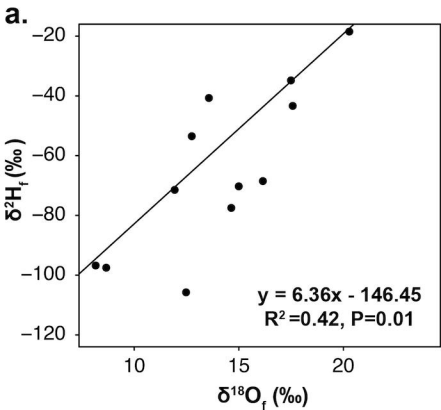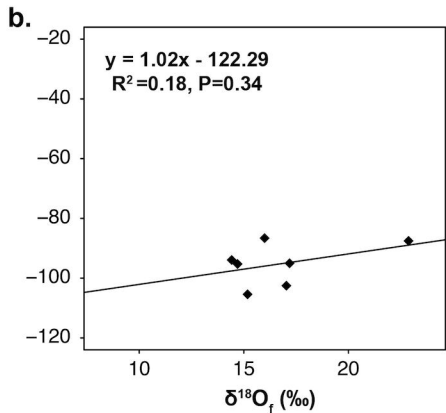

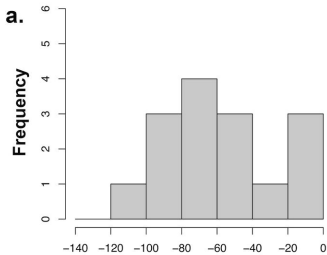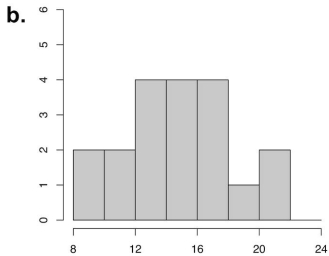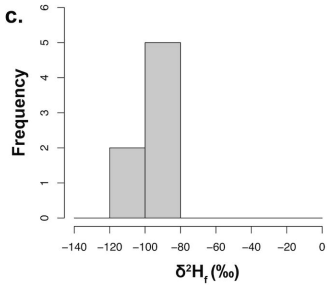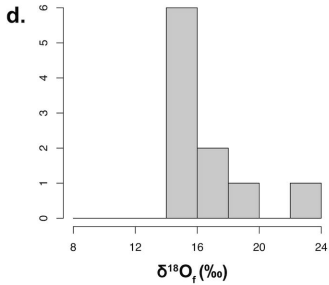

**a.**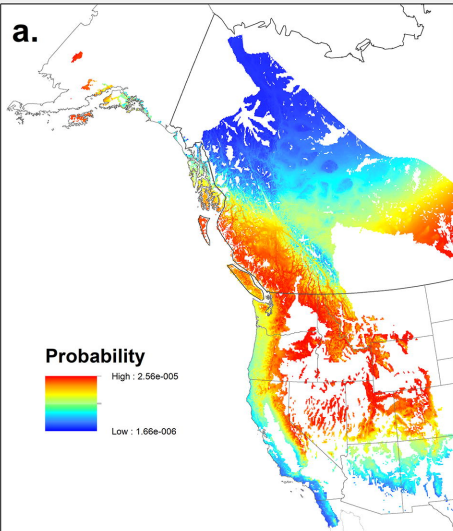**b.**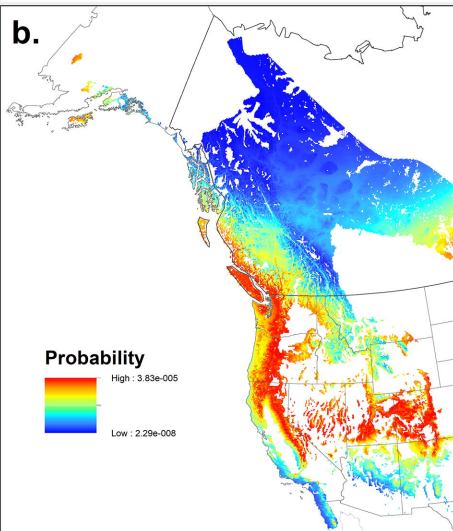**c.**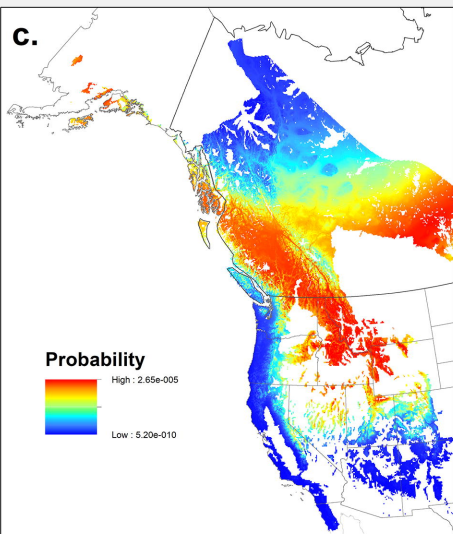**d.**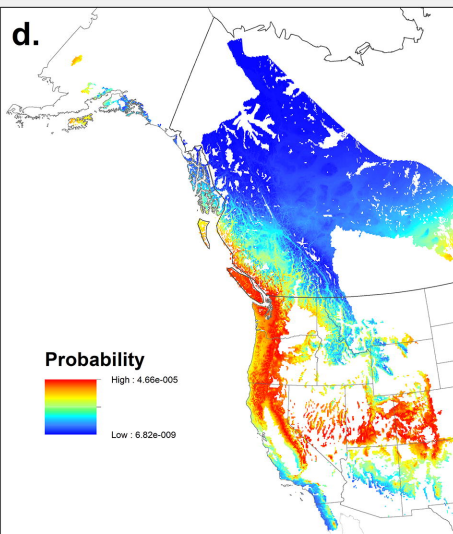

Source: https://www.biorxiv.org/content/10.1101/856278v3.full.pdf
